1 **Rapid DNA methylation-based classification of pediatric brain tumours from**  
2 **ultrasonic aspirate specimens**

3

4 Michèle Simon<sup>1\*</sup>, Luis P. Kuschel<sup>2\*</sup>, Katja von Hoff<sup>3</sup>, Dongsheng Yuan<sup>2</sup>, Pablo  
5 Hernáiz Driever<sup>1</sup>, Elisabeth G. Hain<sup>4</sup>, Arend Koch<sup>4</sup>, David Capper<sup>4,5</sup>, Matthias Schulz<sup>6</sup>,  
6 Ulrich-Wilhelm Thomale<sup>6\*</sup>, Philipp Euskirchen<sup>2,4,5\*</sup>

7

8 1 Charité–Universitätsmedizin Berlin, corporate member of Freie Universität Berlin  
9 and Humboldt Universität zu Berlin, Department of Pediatric Oncology and  
10 Hematology, Berlin, Germany

11 2 Charité-Universitätsmedizin Berlin, Department of Neurology, Berlin, Germany

12 3 Department of Paediatric and Adolescent Medicine, Aarhus University Hospital,  
13 Aarhus, Denmark

14 4 Charité-Universitätsmedizin Berlin, Department of Neuropathology, Berlin,  
15 Germany

16 5 German Cancer Consortium (DKTK), Partner Site Berlin, German Cancer  
17 Research Center (DKFZ), Heidelberg, Germany

18 6 Charité-Universitätsmedizin Berlin, Department of Pediatric Neurosurgery, Berlin,  
19 Germany

20 \*authors contributed equally

21

22 Corresponding Author:

23 Philipp Euskirchen, MD

24 Department of Neuropathology

25 Charité – Universitätsmedizin Berlin

26 Charitéplatz 1

27 10117 Berlin

28 Germany

29 E-Mail: [philipp.euskirchen@dkfz.de](mailto:philipp.euskirchen@dkfz.de)

30

31

32 Keywords:

33 nanopore sequencing, pediatric brain cancer, ultrasonic aspirator

NOTE: This preprint reports new research that has not been certified by peer review and should not be used to guide clinical practice.

34  
35  
36  
37  
38  
39  
40  
41  
42  
43  
44  
45  
46  
47  
48  
49  
50  
51  
52  
53  
54  
55  
56  
57  
58  
59  
60  
61

## Abstract

**Background:** Although cavitating ultrasonic aspirators are commonly used in neurosurgical procedures, the suitability of ultrasonic aspirator-derived tumor material for diagnostic procedures is still controversial. Here, we explore the feasibility of using ultrasonic aspirator-resected tumor tissue to classify otherwise discarded sample material by fast DNA methylation-based analysis using low pass nanopore whole genome sequencing.

**Methods:** ultrasonic aspirator-derived specimens from pediatric patients undergoing brain tumour resection were subjected to low-pass nanopore whole genome sequencing. DNA methylation-based classification using a neural network classifier and copy number variation analysis were performed. Tumor purity was estimated from copy number profiles. Results were compared to microarray (EPIC)-based routine neuropathological histomorphological and molecular evaluation.

**Results:** 18 samples with confirmed neuropathological diagnosis were evaluated. All samples were successfully sequenced and passed quality control for further analysis. DNA and sequencing characteristics from ultrasonic aspirator-derived specimens were comparable to routinely processed tumor tissue. Classification of both methods was concordant regarding methylation class in 16/18 (89%) cases. Application of a platform-specific threshold for nanopore-based classification ensured a specificity of 100%, whereas sensitivity was 78%. Copy number variation profiles were generated for all cases and matched EPIC results in 16/18 (89%) samples, even allowing the identification of diagnostically or therapeutically relevant genomic alterations.

**Conclusion:** Methylation-based classification of pediatric CNS tumors based on ultrasonic aspirator-reduced and otherwise discarded tissue is feasible using time- and cost-efficient nanopore sequencing.

62

## 63 **Introduction**

64

65 Ultrasonic aspirator devices are frequently used in pediatric neurosurgery for efficient  
66 microsurgical resection of brain tumours while minimizing tissue damage to  
67 surrounding healthy brain (1). With ultrasonic aspirator, tumor tissue is fragmented in  
68 situ by ultrasound-induced vibration and tissue debris is aspirated using suction. To  
69 date, ultrasonic aspirator tissue specimens have not been used for routine  
70 neuropathological examinations. At the same time, molecular profiling is increasingly  
71 used and required in addition to histomorphology for diagnostic workup and  
72 comprehensive characterization of pediatric brain tumours (2). In particular molecular  
73 classification based on DNA methylation signatures has proven to be a powerful and  
74 elegant unbiased approach to identifying tumor type (3) and has been adopted in the  
75 current World Health Organization (WHO) classification of central nervous system  
76 (CNS) tumours (4). For DNA extraction, however, additional tissue is needed which  
77 may be scarce in pediatric neurosurgery. While for histological examination it  
78 appears necessary to preserve the integrity of the tissue, DNA methylation profiling  
79 (as any nucleic acid-based method) only relies on the integrity of tumor DNA.  
80 Repurposing ultrasonic aspirator tissue specimens as a source of tumor DNA for  
81 molecular diagnostics would maximize use of tumor tissue. To date, only detection of  
82 focal amplifications (5) and gene expression profiling by RNA sequencing (6) in  
83 ultrasonic aspirator tissue samples have been explored .

84 The growth patterns of pediatric brain tumors differ from those of adult tumors in that  
85 they are more likely to spread in the neuraxis (7). Furthermore, highly aggressive  
86 rare embryonal and sarcomatous pediatric CNS tumors for which there are limited  
87 therapeutic recommendations and for which immediate initiation of therapy is  
88 essential have only recently been molecularly redefined (8). The overall time to  
89 integrated diagnosis in pediatric oncology is therefore of considerable importance,  
90 and any delay in initiating first-line therapy may be critical. Indeed, the presence of  
91 molecular markers defining risk groups in therapy trials also leads to different  
92 therapeutic approaches.

93 Recently, we have demonstrated, that low-pass nanopore whole genome sequencing  
94 (WGS) is non-inferior to microarray-based DNA methylation profiling of CNS tumors  
95 (9). In addition, real-time analysis is feasible, enabling a reliable intraoperative

96 diagnosis within a surgically relevant time frame at low cost (10). In addition, adaptive  
97 sequencing allows to enrich genomic regions of interest in the same WGS run to  
98 detect clinically relevant SNV and SV (11).

99 In the present study, we studied whether DNA methylation-based classification can  
100 be reliably performed using DNA from tumor tissue fragments obtained by ultrasonic  
101 aspirator devices using low-pass nanopore whole genome sequencing in order to  
102 overcome time-consuming tissue processing and maximize use of limited material in  
103 pediatric neuro-oncology.

## 104 105 **Methods**

### 106 107 **Study design**

108 We conducted a prospective, proof-of-concept single-center study using ultrasonic  
109 aspirator tissue specimens for molecular characterization of pediatric CNS tumors  
110 using nanopore WGS (Fig. 1 (A)). All patients < 18 years who underwent surgery for  
111 tumor resection using an ultrasonic aspiration device at the Department of Pediatric  
112 Neurosurgery, Charité-Universitätsmedizin Berlin, Germany, between February 6th,  
113 2020, and October 5th, 2020, were screened. Informed written consent was obtained  
114 from patients and/or guardians. The study was approved by the local ethics  
115 committee (Charité –Universitätsmedizin Berlin, Berlin, Germany; EA2/041/18) and  
116 performed according to the guidelines for Good Scientific Practice. Ultrasonic  
117 aspirator tissue samples taken with the LEVICS device (Söring, Quickborn,  
118 Germany), which are normally discarded after surgery, are collected using a  
119 bronchoalveolar lavage trap, which is connected to the suction tubing coming from  
120 the sonotrode instruments and connected to the suction reservoir. Thereby about 5ml  
121 of fluid including fragmented tumor tissue could be collected. In parallel, regularly  
122 resected tumor tissue was processed for routine neuropathological procedures  
123 including phenotypic-genotypic diagnostics. All study data were archived under an ID  
124 key accessible only to the research group (pseudonymization). Pseudonymized study  
125 data were recorded using REDCap (13), which was provided by the Berlin Institute of  
126 Health's Clinical Research Unit in a certified computing environment.

### 127 128 **Ultrasonic aspirator tissue sample processing**



129 Fresh ultrasonic aspirator fluid aliquots were centrifuged at 1.000 rpm for 5  
130 min, supernatant was discarded and pellets stored at -40°C. DNA was extracted from  
131 ~25 mg thawed aspirate and purified using the DNeasy Blood & Tissue Kit (Qiagen,  
132 NL). Based on the 260/280 ratio (NanoDrop, Thermo Fisher, USA), DNA quality was  
133 determined, followed by DNA quantification with a Qubit 4.0 fluorometer using a  
134 dsDNA BR Assay (Thermo Fisher, USA).

135

### 136 **Nanopore low-pass whole genome sequencing**

137 All samples were subjected to low-pass whole genome sequencing as described  
138 previously (9). Preprocessing of raw data for sequencing was performed using the  
139 publicly available nanoDx pipeline (<https://gitlab.com/pesk/nanoDx>, v0.5.1). Briefly,  
140 basecalling of nanopore FAST5 raw data was performed using guppy v5.0.16  
141 (Oxford Nanopore Technologies, UK) and aligned to the hg19 human reference  
142 genome using minimap2 v2.15 (14). In order to assess the feasibility of ultrasonic  
143 aspirator-derived nanopore sequencing, the aligned sequencing data was normalized  
144 to a six hour sequencing window and were compared to a previously published  
145 dataset of 16 brain tumor samples obtained during routine nanopore sequencing  
146 from fresh-frozen tumor tissue (9). DNA methylation was assessed using nanopolish  
147 v0.11.1 (15). After binarization of beta values with threshold = 0.6 (9), features with  
148 zero variance were filtered out, leading to 366,263 CpG sites retained. These were  
149 used to train the neural network model with randomly masked features. PyTorch, an  
150 open source deep-learning framework, was used to develop the model (16). To  
151 obtain class probability estimates that can be used to guide diagnostic decision-  
152 making, a normalization function and a Softmax layer was used to convert the raw  
153 values into a probability that measures the confidence in the brain tumor class  
154 assignment (the calibrated score). Returned majority votes were combined to  
155 methylation class families (MCF), if feasible (9). Complementarily, data was  
156 displayed using t-distributed Stochastic Neighborhood Embedding (t-SNE) (17).

157

### 158 **CNS tumor classification**

159 All cases were classified according to the 2016 WHO CNS classification during  
160 routine neuropathological examination at the Department of Neuropathology, Charité  
161 Universitätsmedizin Berlin. The recent 2021 edition (4) was not yet available during  
162 the study period of this patient cohort. Nanopore classification results were compared

163 to the reference diagnosis as well as microarray-based classification results of the  
164 same tumor considering the established cut-off values for the probability score.

165

### 166 **Copy number analysis**

167 Copy number variation (CNV) analysis from nanopore WGS data was performed  
168 using the QDNAseq package v1.8.0 and R/Bioconductor v3.3 as described before  
169 (18, 19). To account for region- and technology-specific artifacts, public nanopore  
170 WGS data for the NA12878 human reference genome were processed and  
171 subtracted from the normalized bin counts of the tumor samples for case reports. To  
172 estimate tumor purity in aneuploid tumors, absolute copy number estimation of  
173 nanopore- and microarray-based data was performed using the ACE software  
174 package (v1.6.0) (20). All estimates were verified manually.

175

### 176 **Methylation array processing**

177 Infinium MethylationEPIC BeadChip microarrays (Illumina) were used to obtain  
178 genome-wide DNA methylation profiles for tumor samples during routine  
179 neuropathological diagnostic examination. Data were generated following the  
180 manufacturer's protocol at the Department of Neuropathology, Charité -  
181 Universitätsmedizin Berlin, using >250 ng of DNA from FFPE tissues as input  
182 material. For classification, IDAT files were uploaded to the public Heidelberg brain  
183 tumour classifier available at <https://www.molecularneuropathology.org> (v.11b4).

### 184 **Statistical analysis**

185 Reproducible and easy-to-deploy pipelines were implemented using snakemake  
186 (v.7.15.2) (21). Data analysis was mainly performed using R (v.4.0.2). Figures were  
187 designed using ggplot2 (v.3.3.2). Statistical analyses were performed using IBM  
188 SPSS® 29 (Armonk, N.Y., USA)

189

### 190 **Data and code availability**

191 The nanoDx analysis pipeline for end-to-end analysis of nanopore WGS data is  
192 available at <https://gitlab.com/pesk/nanoDx> (v.0.5.1). Source code to reproduce all  
193 analyses and sequencing data based figures in this work is provided at  
194 <https://gitlab.com/pesk/nanoCUSA>. Raw sequencing data have been deposited at the  
195 European Genome-phenome archive (accession no. tbd), while methylation

196 microarray data and nanopore methylation calls are available from Gene Omnibus  
197 Express (accession no. tbd).

## 198 199 **Results**

### 200 201 **Patient characteristics**

202 A total of 21 children undergoing surgery participated in the study. 3/21 (14.9%) of  
203 patients were excluded from analysis due to non-diagnostic scores in microarray-  
204 based classification (n=2) or final diagnosis of non-neoplastic disease (n=1).  
205 Eventually, our cohort comprised 18 tumor aspirates from 18 pediatric patients (Table  
206 1). 33% of patients (n=6) were male. Median age at surgery was 7.5 years (range 1  
207 to 17 years). Twelve patients suffered from a newly diagnosed cerebral lesion,  
208 whereas six samples were obtained from a second or further intervention. Five  
209 patients had received previous treatment with vincristine/carboplatin according to the  
210 European guidelines for low-grade glioma (LGG) (n=4) or  
211 cyclophosphamide/vincristine/methotrexate/carboplatin/etoposide according to the  
212 current treatment recommendation of the German Society of Pediatric Oncology and  
213 Hematology (GPOH) for newly diagnosed medulloblastoma, ependymoma, and  
214 pineoblastoma (n=1). One patient with LGG was previously treated with vinblastine  
215 monotherapy and targeted therapy using a MEK inhibitor. The most frequent  
216 diagnosis was pilocytic astrocytoma (50%, n=9).

### 217 218 **Sequencing characteristics of tumor DNA from ultrasonic aspirator tissue** 219 **samples**

220 Low-pass whole genome sequencing performed for at least 6 hours resulted in a  
221 mean genome coverage of 0.44X (range 0.01X to 1.5X, Suppl. Table 1). The mean  
222 read length ranged between 4,047 and 10,440 base pairs with a mean of 7,377 base  
223 pairs and was comparable to reads obtained in an external cohort of sequencing runs  
224 of tumor DNA extracted from fresh-frozen tissue (Fig. 1B). The mean number of CpG  
225 sites overlapping the reference atlas was 100,852 CpGs (range: 2,275 to 295,872  
226 CpG sites), exceeding the minimum number of 1,000 overlapping CpG sites for  
227 meaningful analysis in 18/18 (100%) samples. In two cases, the minimum number of  
228 CpG sites was not achieved initially and required an additional sequencing run. On  
229 average, after six hours of sequencing 1,054 Mb of aligned base pairs were obtained

230 (range: 23.76 Mb - 2299.12 Mb), which again was comparable to sequencing runs  
231 from fresh-frozen tissue (Fig. 1C). Tumor cell content was reliably estimated from  
232 copy number alterations in 4/20 (20%) tumors with a mean tumor purity of 0.37  
233 (range 0.25 – 0.65) (Fig. 1D). Tumor purity was higher in ultrasonic aspirator tissue  
234 samples compared to FFPE tissue for routine workup in 3 out of 4 (75%) cases.

235

### 236 **DNA methylation-based classification**

237 Tumors were classified based on DNA methylation profiles using a neural network  
238 model which had been trained using the Heidelberg brain tumour reference cohort  
239 with CNS tumor methylation datasets of 2,801 samples and predictions were made  
240 with respect to the 91 methylation classes (MC) or methylation class family (MCF),  
241 respectively, as defined in the 11b4 version (3). A single nanopore-specific cut-off  
242 value was determined by recalibrating the raw values to identify valid predictions.  
243 Receiver operating characteristic curve analysis of the maximum calibrated scores  
244 was used to determine an optimal cut-off value > 0.2.

245 Classification results were identical to microarray in 16/18 (89%) of cases and  
246 compatible with the integrative histopathological reference diagnosis in 16/18 (89%)  
247 cases (Figure 2). Application of the optimal calibrated score threshold of >0.2  
248 resulted in 14/18 cases passing the cut-off all of which were correctly classified,  
249 corresponding to a specificity of 100% and a sensitivity of 78% on both MC and MCF  
250 level (Figure 2).

251 At the MC level, in 2/18 (11%) cases, the score was below the optimal threshold but  
252 classification was still correct (one YAP-fusion positive ependymoma, one  
253 subependymal giant-cell astrocytoma (SEGA)). 2/18 (11%) cases had discordant  
254 results with scores that were below the calibrated nanopore-specific threshold: In the  
255 first case, pilocytic astrocytoma (PA) subtype was incorrect (classifying the case as  
256 midline PA instead of posterior fossa PA) while correctly classifying the sample as PA  
257 on MCF level. The other sample was an IDH-mutant astrocytoma classified as control  
258 tissue. Here, additional Sanger sequencing revealed no IDH mutation in the  
259 ultrasonic aspirator tissue sample, potentially indicating a sampling issue.

260 For comparison, the microarray-based analysis from matched FFPE tissue yielded a  
261 diagnostic score in 16/18 (89%) cases. Of note, the two cases with nondiagnostic  
262 score included one case of SEGA that also received a low score in  
263 nanopore/ultrasonic aspirator tissue profiling.

264

## 265 **Copy number profiling**

266 Copy number profiles obtained from WGS closely resembled matched array-based  
267 profiles in 16/18 (88.9 %) cases and enabled the detection of large chromosomal  
268 alterations, whereas two nanopore-based CNVs (both pilocytic astrocytomas) were  
269 insufficient for interpretation (Suppl. Figure 1). In contrast, low-level focal gains such  
270 as tandem duplications resulting in *BRAF* fusion genes in the PA samples were  
271 visually identified in 1/9 (11.1 %) cases from nanopore CNV profiles compared with  
272 detection in 8/9 (88.8 %) in matched CNV profiles from methylation microarrays  
273 (Suppl. Figure 1).

274

## 275 **Discussion**

276

277 Molecular testing is an essential component of state-of-the-art integrated  
278 neuropathological diagnostics for most pediatric brain tumor types. Due to the  
279 increasing number of pathological examinations required (such as DNA and RNA  
280 gene panel sequencing or methylation microarray), tissue is valuable. This proof-of-  
281 principle study reports, to our knowledge, the first application of ultrasonic aspirator-  
282 derived tumor tissue for molecular classification of pediatric CNS tumors using low-  
283 pass nanopore whole genome sequencing. We show that ultrasonic aspirator-derived  
284 tumor fragments are a representative source of tumor DNA with tumor cell content  
285 sufficient to DNA methylation-based classification and yielding identical classification  
286 results.

287

### 288 **Tissue characteristics**

289 Although the use of ultrasonically minced tumor tissue for histopathological analysis  
290 of brain tumor tissue has been demonstrated in some studies, the suitability is still  
291 matter of debate (23-26). In particular, the grading of glial tumors has been reported  
292 difficult as histomorphology was only partly recapitulated.

293 Using read length distribution of mapped nanopore reads as a proxy of DNA  
294 fragment length, we find no significant difference in DNA extracted from fresh  
295 ultrasonic aspirator tissue aspirates compared to routinely prepared fresh-frozen  
296 tissue. Our analysis thus confirms that high molecular weight genomic DNA suitable  
297 for nanopore sequencing can be extracted when ultrasonic aspirator-derived tissue is

298 used. Additionally, similar aligned base yields indicate comparable sequencing  
299 performance. Tumor purity estimations for microarray and nanopore indicate a  
300 tendency towards higher tumor purity in ultrasonic aspirator tissue samples.  
301 However, the estimation depends on the existence of numerical chromosomal  
302 alterations. As expected, the majority of cases within a pediatric cohort are pilocytic  
303 astrocytomas which lack relevant aneuploidy. Therefore, tumor purity could only be  
304 determined in 4 cases.

305 One of the major advantages of using ultrasonic aspirator tissue samples is that  
306 multiple areas of the excised tumor are sampled (23). This is particularly important  
307 because analyses based on single biopsies may have potential consequences for  
308 treatment decisions in spatially and temporally heterogeneous pediatric tumors (27,  
309 28). In contrast, DNA extraction for methylome profiling is usually done after  
310 microdissection of a representative area of the tumor sample with an anticipated  
311 tumor cell content of  $\geq 70\%$  and therefore reflects only a subset of the entire tumor  
312 (3).

313

#### 314 **Comparison to microarray-based classification**

315 It was recently demonstrated, that the application of nanopore technology can be  
316 used with comparable reliability for processing of fresh frozen tissue compared to  
317 microarray-based analysis of FFPE material (9). Our analysis confirms its suitability  
318 when using ultrasonic aspirator-derived tissue. Similar to the observed sensitivity of  
319 88% in a well-defined validation cohort for microarray-based classification (3), our  
320 approach reaches an overall accuracy of 89% and a sensitivity of 78% for the  $> 0.2$   
321 cut-off while retaining 100% specificity. In contrast, in a real-world cohort enriched for  
322 challenging cases a sensitivity as low as 56% was reported for EPIC-based  
323 microarray analysis (29).

324 Especially low-tumor cell content, like in the infiltration zone of diffuse glioma, can be  
325 challenging for the performance of DNA methylation-based classification (30) and  
326 was likely the cause for the discordantly classified cases (before application of  
327 diagnostic cut-offs) in this cohort. Therefore, low tumor cell content poses a  
328 challenge to methylation-based classification in general, independent of the  
329 processed tissue type or technology platform used for methylome profiling.

330 Copy number profiles can be derived both from nanopore low-pass WGS and  
331 methylation microarray datasets. While the resolution of microarray-based CNV plots



332 is fixed due to the probe set of the chip, resolution of low-pass WGS-based CNV  
333 plots correlates with read yield. In our cohort, the quality of nanopore CNV plots was  
334 frequently inferior to the matched microarray-based ones. However, next generation  
335 flow cells and chemistries for nanopore sequencing devices offer better yields and  
336 are likely to resolve these issues.

337

### 338 *Conclusion*

339 DNA methylation-based classification of pediatric CNS tumors from ultrasonic  
340 aspirator-fragmented tissue is feasible using nanopore sequencing. A neural network  
341 classifier with nanopore-specific diagnostic score thresholds assures high specificity  
342 while achieving acceptable sensitivity. Generation of CN profiles is possible and  
343 allows for detection of chromosomal changes, but was currently inferior in detection  
344 of focal changes (e.g. *BRAF* tandem duplication) compared to microarray  
345 approaches. This approach allows maximum exploitation of available tissue for  
346 diagnostics. Since advanced molecular techniques have limited benefit for patients in  
347 resource-challenged centers, our time- and cost-efficient approach may be of  
348 particular interest.

349

### 350 **Acknowledgments**

351 We thank Aydah Sabah for expert technical assistance. Computation has been  
352 performed on the HPC for Research cluster of the Berlin Institute of Health. P.E. has  
353 been a participant in the BIH-Charité Clinical Scientist Program funded by the Charité  
354 – Universitätsmedizin Berlin and BIH.

355 Figures were created in part using Servier Medical Art provided by Servier and  
356 licensed under a Creative Commons Attribution 3.0 unported license. In addition,  
357 images illustrating nanopore sequencing were reproduced with permission from  
358 Oxford Nanopore Technologies Plc, United Kingdom.

359

### 360 **Conflicts of interest**

361 PHD is ICI of the Sprinkle study and advisory board member for Alexion. DC declares  
362 a patent for a method to classify tumors according to DNA methylation signature. All  
363 other authors declare no conflicts of interest.

364

### 365 **References**



366

- 367 1. Zebian B, Vergani F, Lavrador JP, Mukherjee S, Kitchen WJ, Stagno V, et al.  
368 Recent technological advances in pediatric brain tumor surgery. *CNS Oncol.*  
369 2017;6(1):71-82.
- 370 2. Sturm D, Capper D, Andreiuolo F, Gessi M, Kolsche C, Reinhardt A, et al.  
371 Multiomic neuropathology improves diagnostic accuracy in pediatric neuro-oncology.  
372 *Nat Med.* 2023;29(4):917-26.
- 373 3. Capper D, Jones DTW, Sill M, Hovestadt V, Schrimpf D, Sturm D, et al. DNA  
374 methylation-based classification of central nervous system tumours. *Nature.*  
375 2018;555(7697):469-74.
- 376 4. Louis DN, Perry A, Wesseling P, Brat DJ, Cree IA, Figarella-Branger D, et al.  
377 The 2021 WHO Classification of Tumors of the Central Nervous System: a summary.  
378 *Neuro Oncol.* 2021;23(8):1231-51.
- 379 5. Truong LN, Patil S, Martin SS, LeBlanc JF, Nanda A, Nordberg ML, et al.  
380 Rapid detection of high-level oncogene amplifications in ultrasonic surgical  
381 aspirations of brain tumors. *Diagn Pathol.* 2012;7:66.
- 382 6. Alenda C, Rojas E, Valor LM. FFPE samples from cavitation ultrasonic  
383 surgical aspirates are suitable for RNA profiling of gliomas. *PLoS One.*  
384 2021;16(7):e0255168.
- 385 7. Merchant TE, Pollack IF, Loeffler JS. Brain tumors across the age spectrum:  
386 biology, therapy, and late effects. *Semin Radiat Oncol.* 2010;20(1):58-66.
- 387 8. Gojo J, Kjaersgaard M, Zezschwitz BV, Capper D, Tietze A, Kool M, et al.  
388 Rare embryonal and sarcomatous central nervous system tumours: State-of-the art  
389 and future directions. *Eur J Med Genet.* 2023;66(1):104660.
- 390 9. Kuschel LP, Hench J, Frank S, Hench IB, Girard E, Blanluet M, et al. Robust  
391 methylation-based classification of brain tumours using nanopore sequencing.  
392 *Neuropathol Appl Neurobiol.* 2022:e12856.
- 393 10. Djirackor L, Halldorsson S, Niehusmann P, Leske H, Capper D, Kuschel LP, et  
394 al. Intraoperative DNA methylation classification of brain tumors impacts  
395 neurosurgical strategy. *Neurooncol Adv.* 2021;3(1):vdab149.
- 396 11. Patel A, Dogan H, Payne A, Krause E, Sievers P, Schoebe N, et al. Rapid-  
397 CNS(2): rapid comprehensive adaptive nanopore-sequencing of CNS tumors, a  
398 proof-of-concept study. *Acta Neuropathol.* 2022;143(5):609-12.
- 399 12. Branton D, Deamer DW, Marziali A, Bayley H, Benner SA, Butler T, et al. The  
400 potential and challenges of nanopore sequencing. *Nat Biotechnol.* 2008;26(10):1146-  
401 53.
- 402 13. Harris PA, Taylor R, Thielke R, Payne J, Gonzalez N, Conde JG. Research  
403 electronic data capture (REDCap)--a metadata-driven methodology and workflow  
404 process for providing translational research informatics support. *J Biomed Inform.*  
405 2009;42(2):377-81.
- 406 14. Li H. Minimap2: pairwise alignment for nucleotide sequences. *Bioinformatics.*  
407 2018;34(18):3094-100.
- 408 15. Simpson JT, Workman RE, Zuzarte PC, David M, Dursi LJ, Timp W. Detecting  
409 DNA cytosine methylation using nanopore sequencing. *Nat Methods.*  
410 2017;14(4):407-10.
- 411 16. Paszke A, Gross S, Massa F, Lerer A, Bradbury J, Chanan G, et al. Pytorch:  
412 An imperative style, high-performance deep learning library. *Advances in neural*  
413 *information processing systems.* 2019;32.
- 414 17. van der Maaten L; Hinton G. Visualizing data using t-sne. *Journal of Machine*  
415 *Learning Research,* 9(Nov):2579–2605, 2008.

- 416 18. Euskirchen P, Bielle F, Labreche K, Kloosterman WP, Rosenberg S, Daniau  
417 M, et al. Same-day genomic and epigenomic diagnosis of brain tumors using real-  
418 time nanopore sequencing. *Acta Neuropathol.* 2017;134(5):691-703.
- 419 19. Scheinin I, Sie D, Bengtsson H, van de Wiel MA, Olshen AB, van Thuijl HF, et  
420 al. DNA copy number analysis of fresh and formalin-fixed specimens by shallow  
421 whole-genome sequencing with identification and exclusion of problematic regions in  
422 the genome assembly. *Genome Res.* 2014;24(12):2022-32.
- 423 20. Poell JB, Mendeville M, Sie D, Brink A, Brakenhoff RH, Ylstra B. ACE:  
424 absolute copy number estimation from low-coverage whole-genome sequencing  
425 data. *Bioinformatics.* 2019;35(16):2847-9.
- 426 21. Koster J, Rahmann S. Snakemake--a scalable bioinformatics workflow engine.  
427 *Bioinformatics.* 2012;28(19):2520-2.
- 428 22. Moudgil-Joshi J, Kaliaperumal C. Letter regarding Louis et al: The 2021 WHO  
429 Classification of Tumors of the Central Nervous System: A summary. *Neuro Oncol.*  
430 2021;23(12):2120-1.
- 431 23. Rao S, Vazhayil V, Nandeesh BN, Beniwal M, Rao K, Yasha TC, et al.  
432 Diagnostic Utility of CUSA Specimen in Histopathological Evaluation of Tumors of  
433 Central Nervous System. *Neurol India.* 2020;68(6):1385-8.
- 434 24. Finley JL, Silverman JF, Dickens MA. Immunocytochemical evaluation of  
435 central nervous system tumors obtained by the Cavitron ultrasonic surgical aspirator.  
436 *Diagn Cytopathol.* 1990;6(5):308-12.
- 437 25. Silverman JF, Jones FD, Unverferth M, Berns L. Cytopathology of neoplasms  
438 of the central nervous system in specimens obtained by the Cavitron Ultrasonic  
439 Surgical Aspirator. *Acta Cytol.* 1989;33(5):576-82.
- 440 26. Richmond IL, Hawksley CA. Evaluation of the histopathology of brain tumor  
441 tissue obtained by ultrasonic aspiration. *Neurosurgery.* 1983;13(4):415-9.
- 442 27. Schmelz K, Toedling J, Huska M, Cwikla MC, Krutzfeldt LM, Proba J, et al.  
443 Spatial and temporal intratumour heterogeneity has potential consequences for  
444 single biopsy-based neuroblastoma treatment decisions. *Nat Commun.*  
445 2021;12(1):6804.
- 446 28. Lazow MA, Hoffman L, Schafer A, Osorio DS, Boue DR, Rush S, et al.  
447 Characterizing temporal genomic heterogeneity in pediatric low-grade gliomas. *Acta*  
448 *Neuropathol Commun.* 2020;8(1):182.
- 449 29. Jaunmuktane Z, Capper D, Jones DTW, Schrimpf D, Sill M, Dutt M, et al.  
450 Methylation array profiling of adult brain tumours: diagnostic outcomes in a large,  
451 single centre. *Acta Neuropathol Commun.* 2019;7(1):24.
- 452 30. Capper D, Stichel D, Sahm F, Jones DTW, Schrimpf D, Sill M, et al. Practical  
453 implementation of DNA methylation and copy-number-based CNS tumor diagnostics:  
454 the Heidelberg experience. *Acta Neuropathol.* 2018;136(2):181-210.  
455

456

## 457 **Figure legends**

458

459 **Figure 1: (A)** Overview of the study design including workflow using ultrasonic  
460 aspirator tissue specimens for nanopore sequencing for DNA methylation-based  
461 classification using a neural network classifier and copy number variation analysis,  
462 comparison to microarray-based routine neuropathological profiling and assessment  
463 of tumor purity by absolute copy number estimation using ACE. Suitability of  
464 ultrasonic aspirator-derived tumor tissue (UA) for nanopore sequencing (T-Test and  
465 Mann-Whitney  $U$  with  $P > .05$ ): **(B,C)** Comparison of **(B)** mean read length and **(C)**  
466 read yield obtained from standard nanopore protocol using fresh-frozen (FrFr) tumor  
467 tissue vs. ultrasonic aspirator-derived sample material indicates similar sequencing  
468 performance. **(D)** In silico tumor purity estimation between nanopore ultrasonic  
469 aspirator tissue samples and microarray FFPE tissue. **(E,F)** Representative  
470 illustration of matched copy number variation profiles obtained from **(E)** ultrasonic  
471 aspirator tissue samples and nanopore sequencing and **(F)** FFPE tumor tissue  
472 subjected to EPIC microarray (850K). Red marker indicates a low-level gain of the  
473 *BRAF* locus suggestive of a *BRAF* gene fusion.

474

475 **Figure 2:** Nanopore classification methylation class call of ultrasonic aspirator-  
476 derived tumor material and the corresponding 2016 WHO CNS reference diagnosis  
477 results showing a specificity of 100% and sensitivity of 77.7 % for cases above the  
478 calibrated threshold of  $> 0.2$ .

479

480 **Suppl. Figure 1:** Comparison of copy number variation profiles obtained from **(A)**  
481 ultrasonic aspirator tissue samples and nanopore sequencing and **(B)** FFPE tumor  
482 tissue subjected to EPIC microarray (850K).

483

484 **Table 1:** Overview of the patient cohort.

485

486

487

488

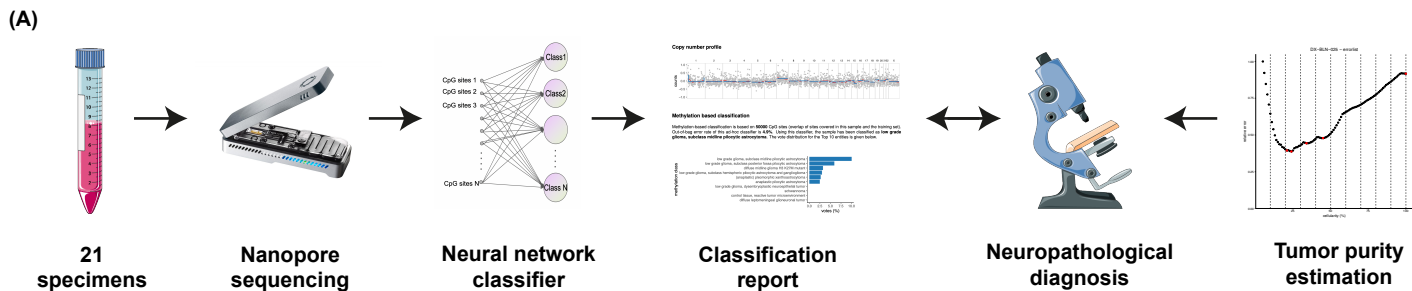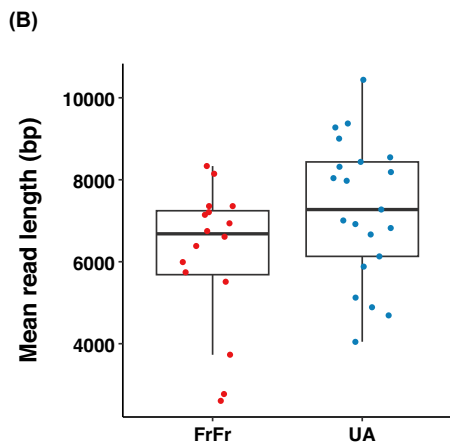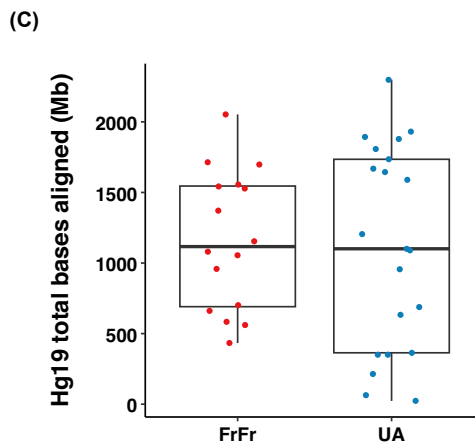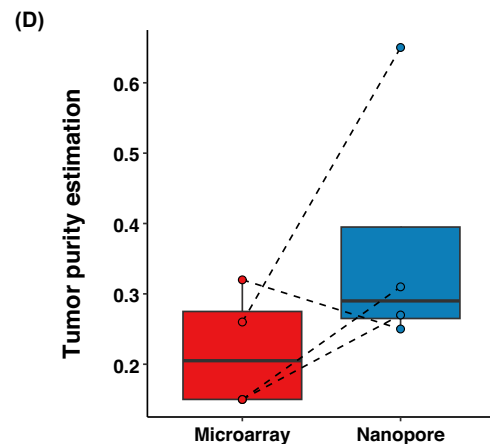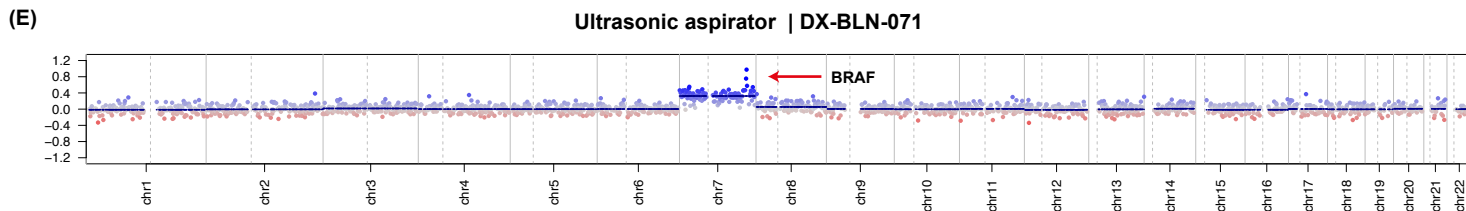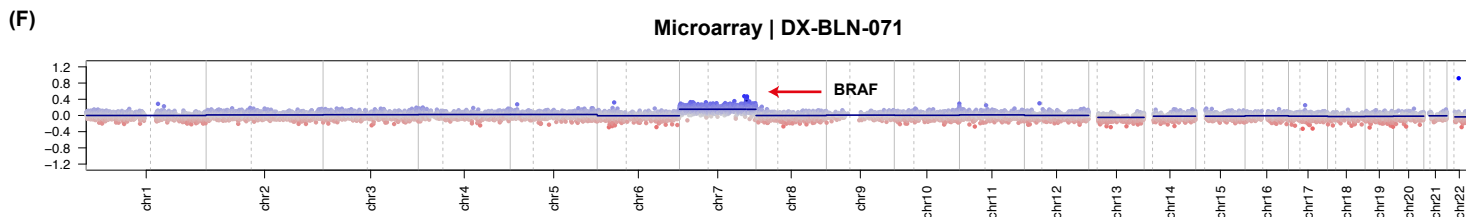

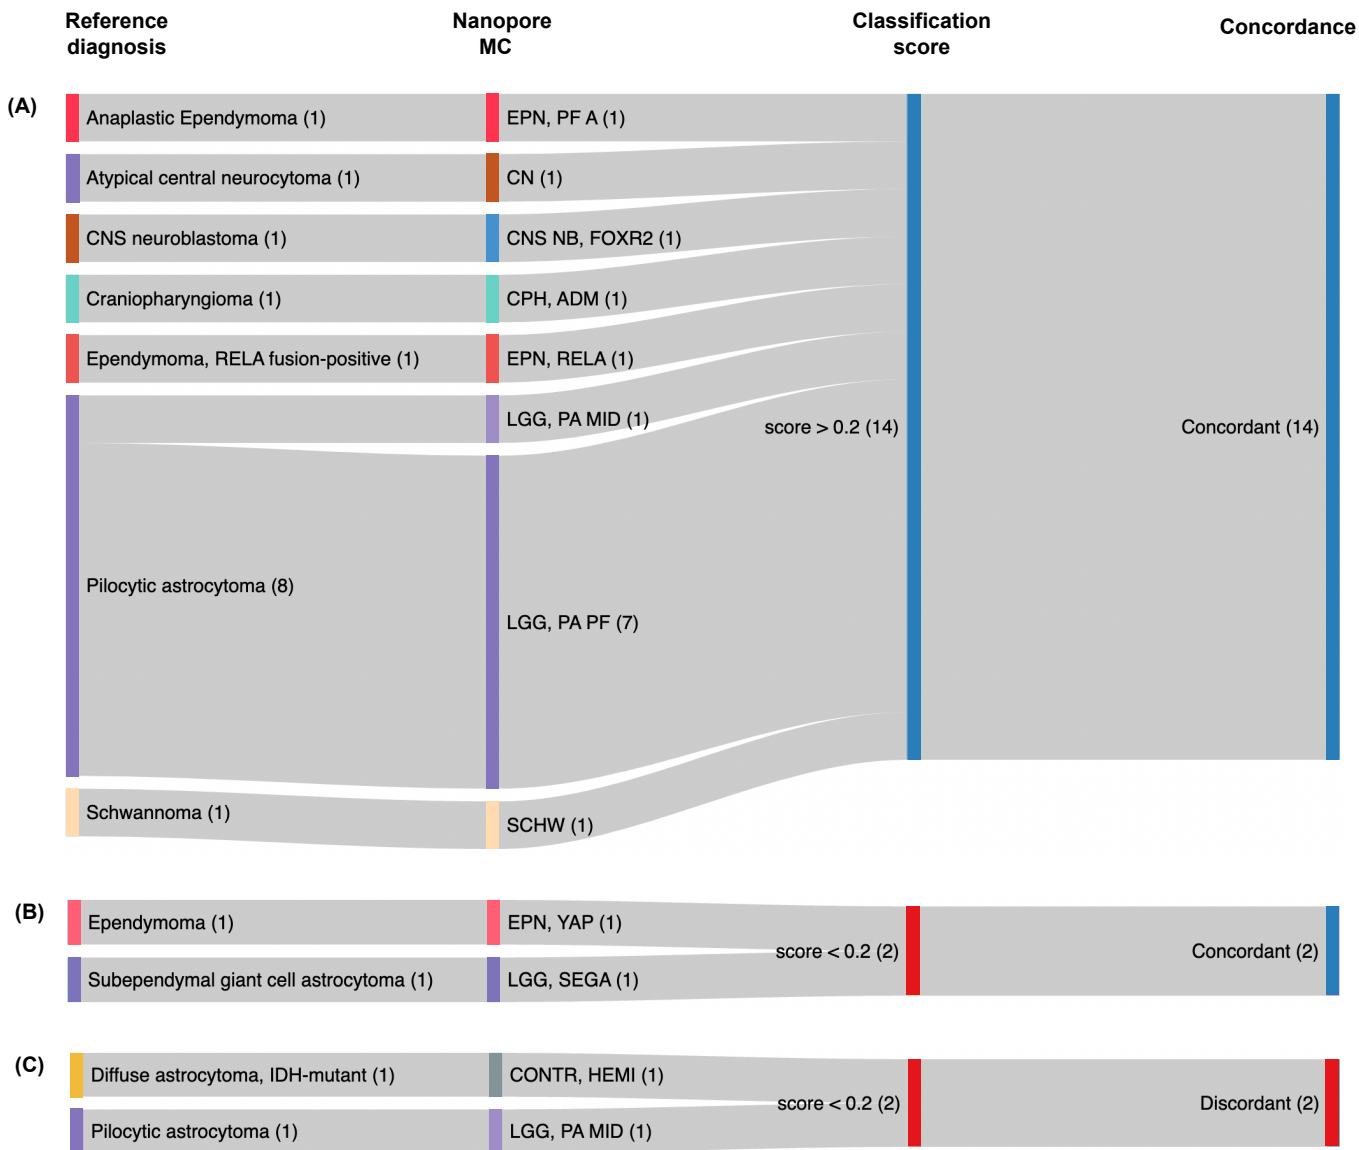

**(A)**

**Ultrasonic aspirator I DX-BLN-025**

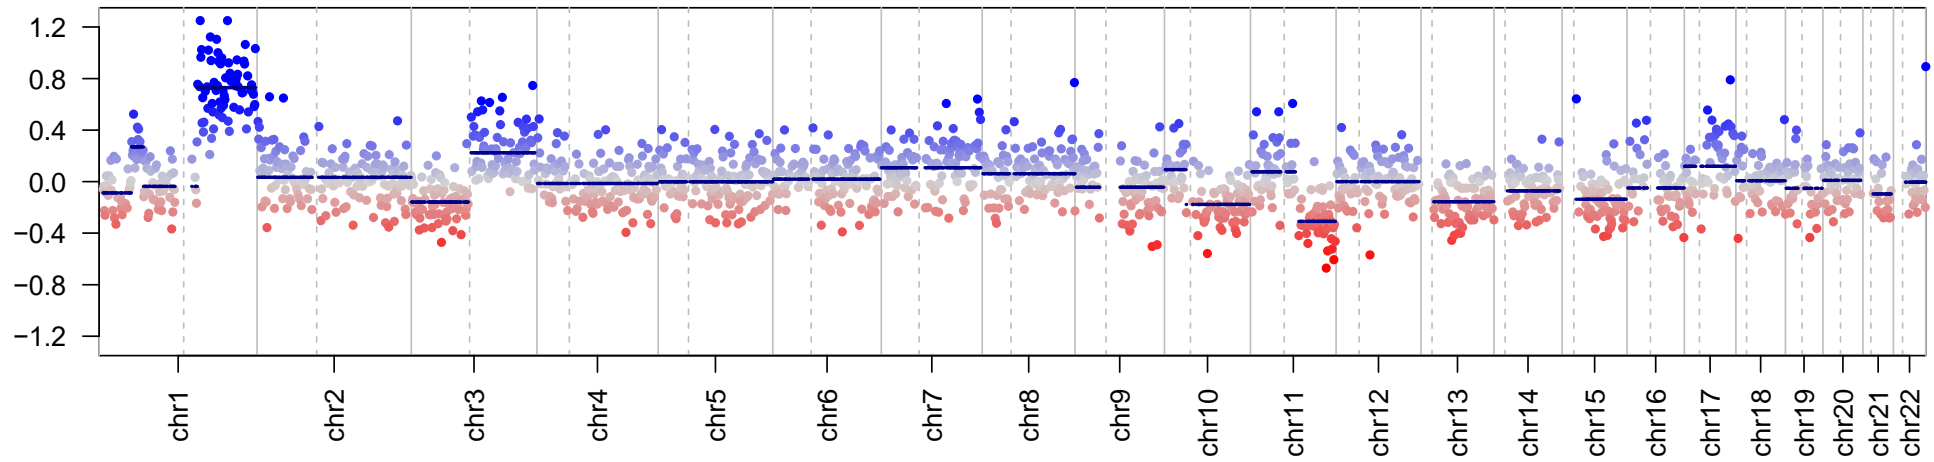

**(B)**

**Microarray I DX-BLN-025**

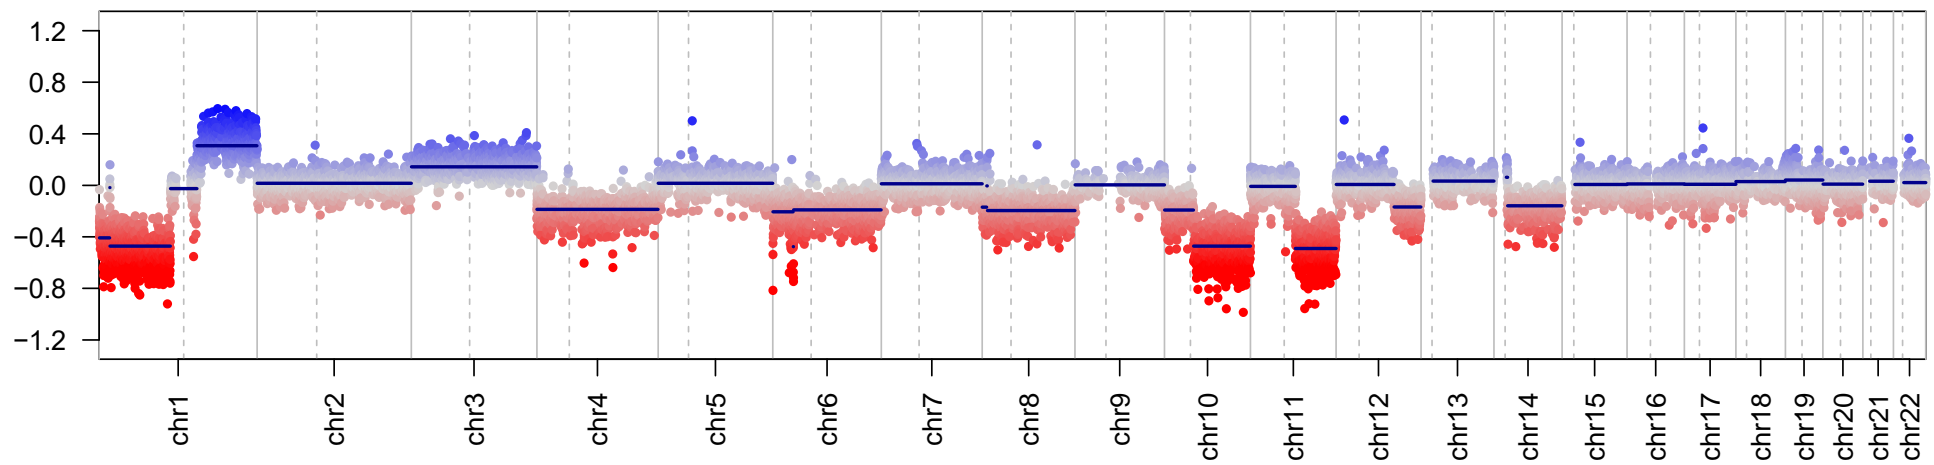

(A)

Ultrasonic aspirator I DX-BLN-027

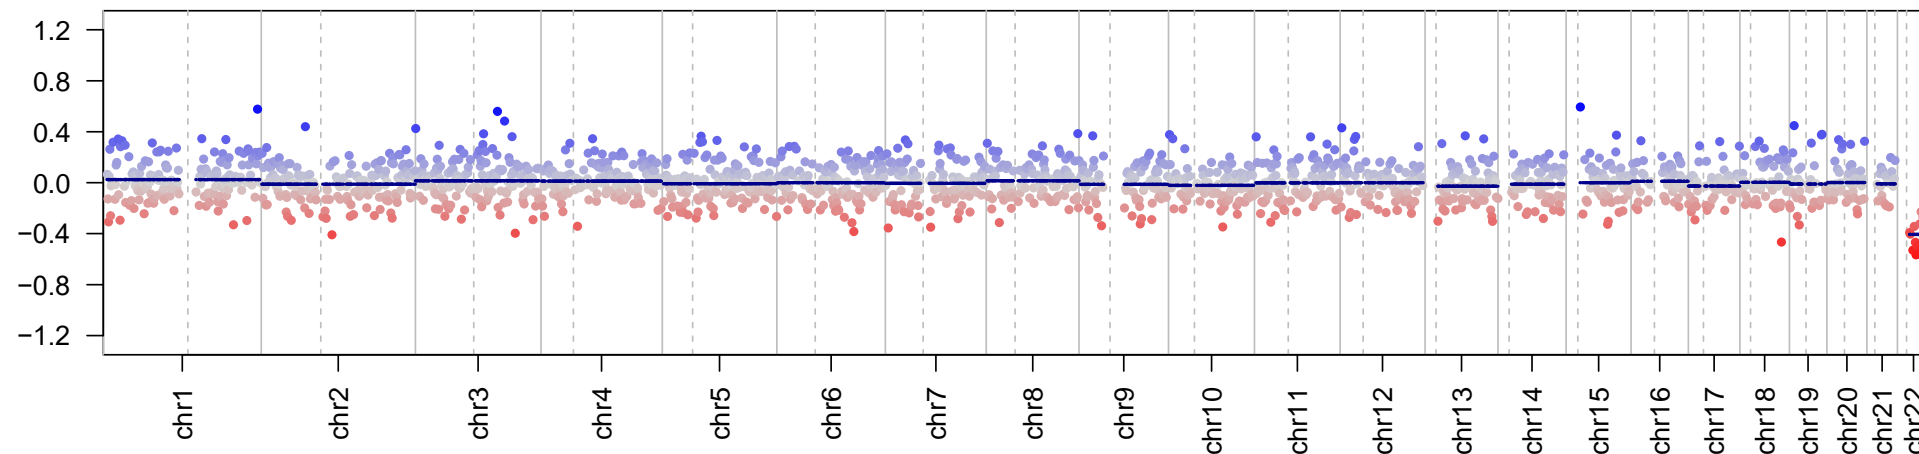

(B)

Microarray I DX-BLN-027

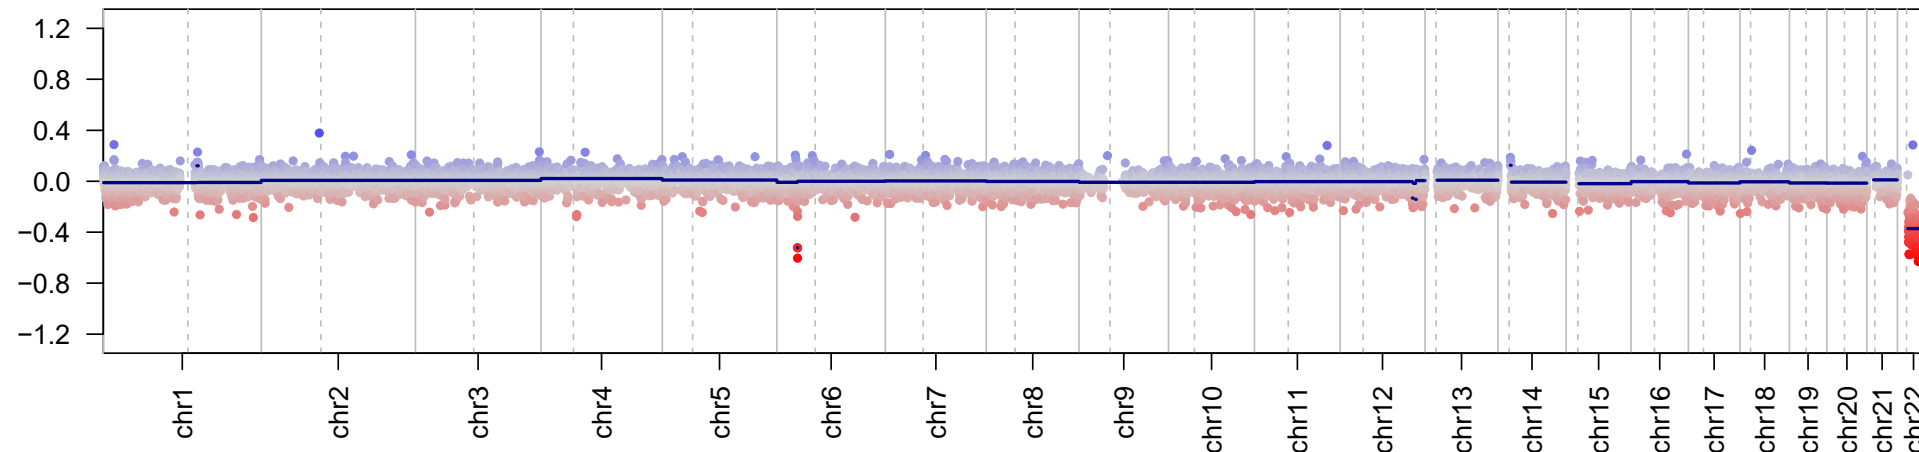



(A)

Ultrasonic aspirator I DX-BLN-028

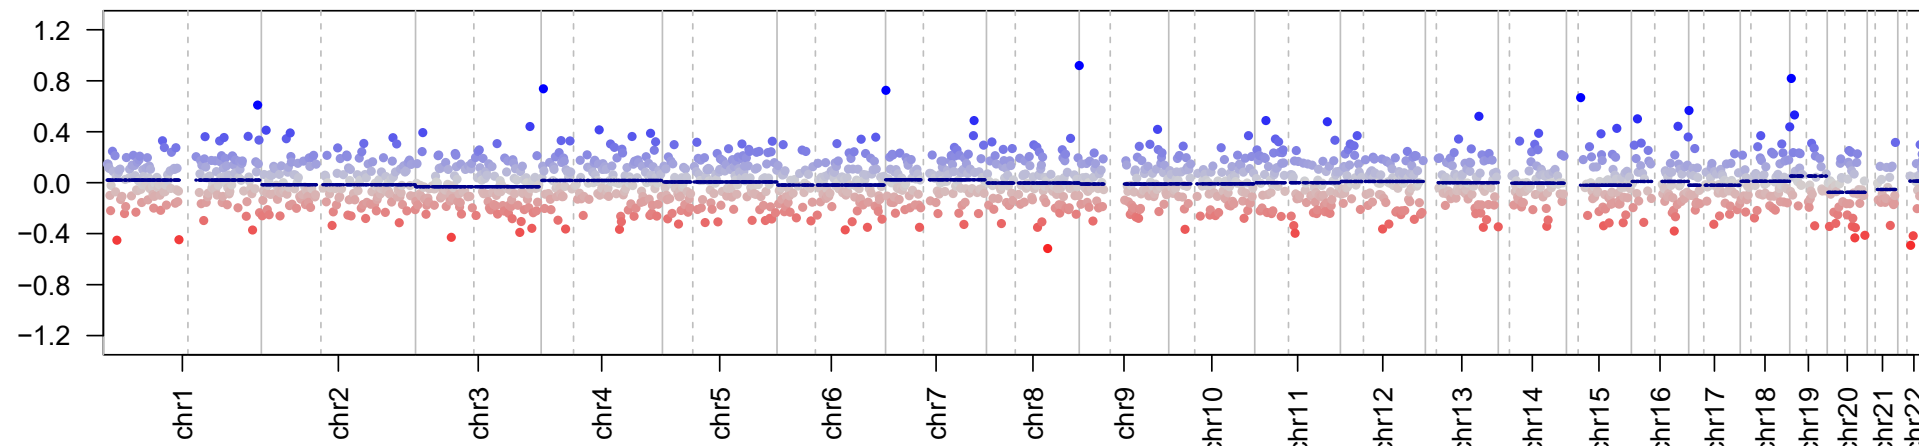

(B)

Microarray I DX-BLN-028

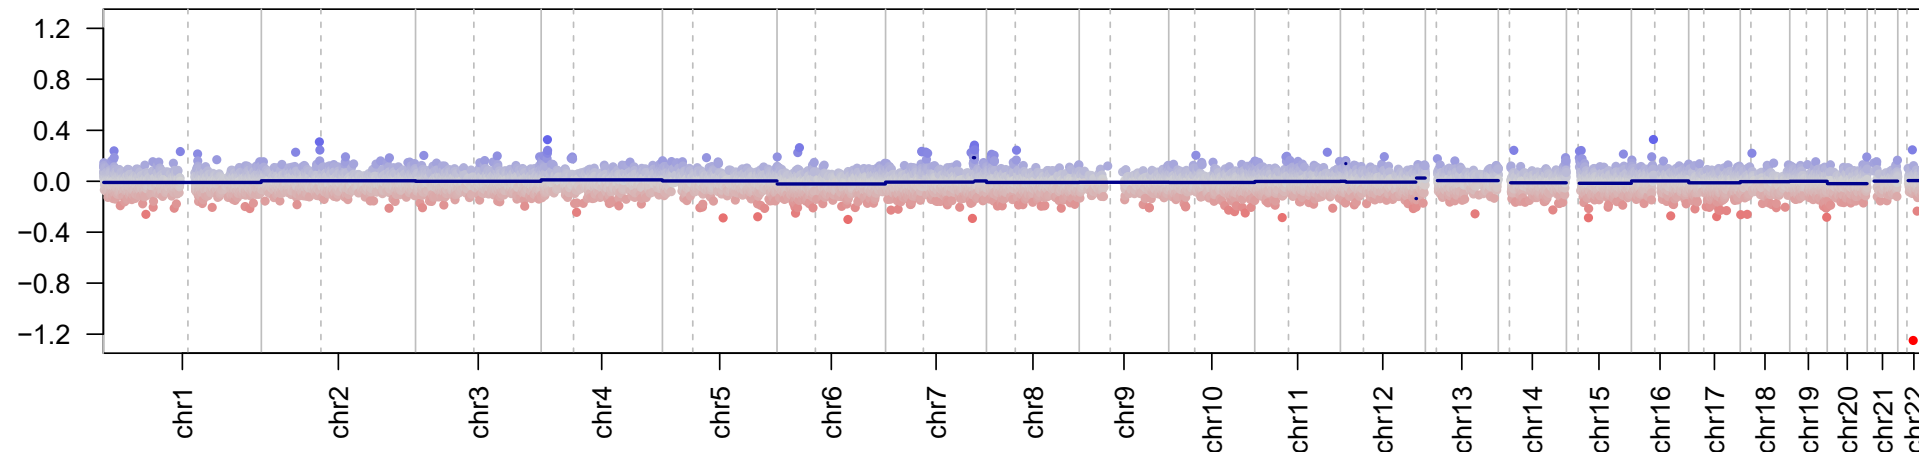

(A)

Ultrasonic aspirator I DX-BLN-029

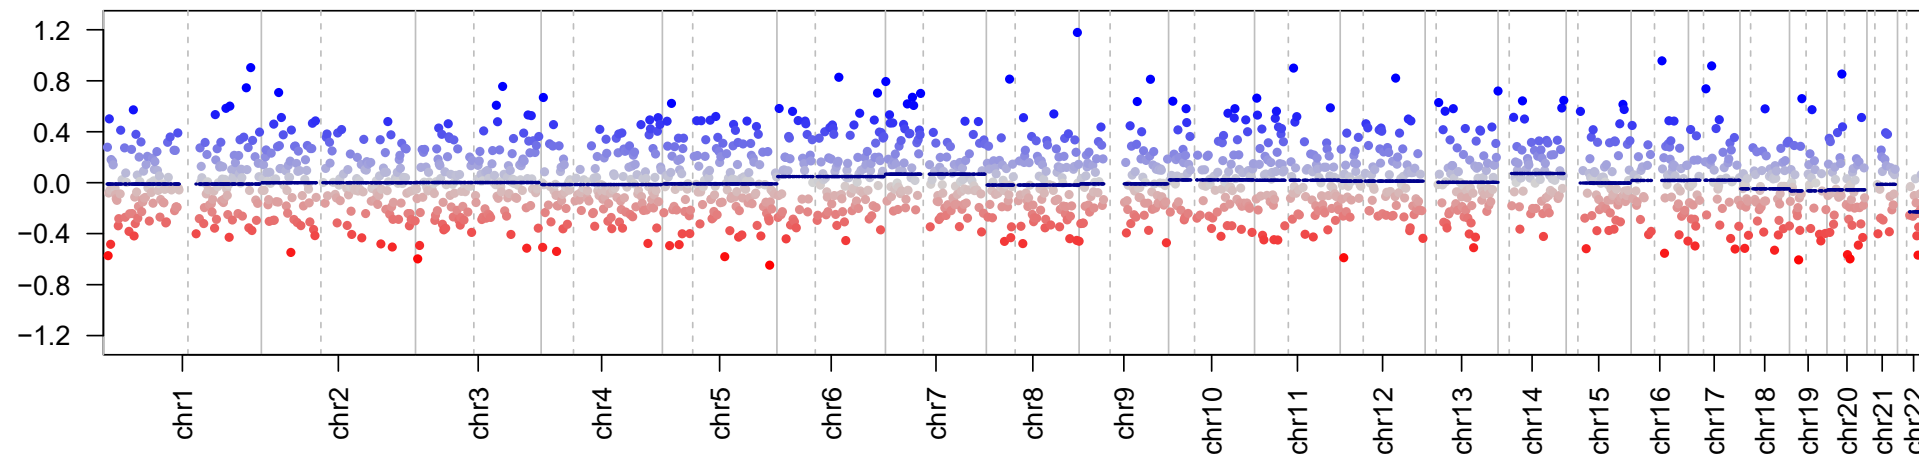

(B)

Microarray I DX-BLN-029

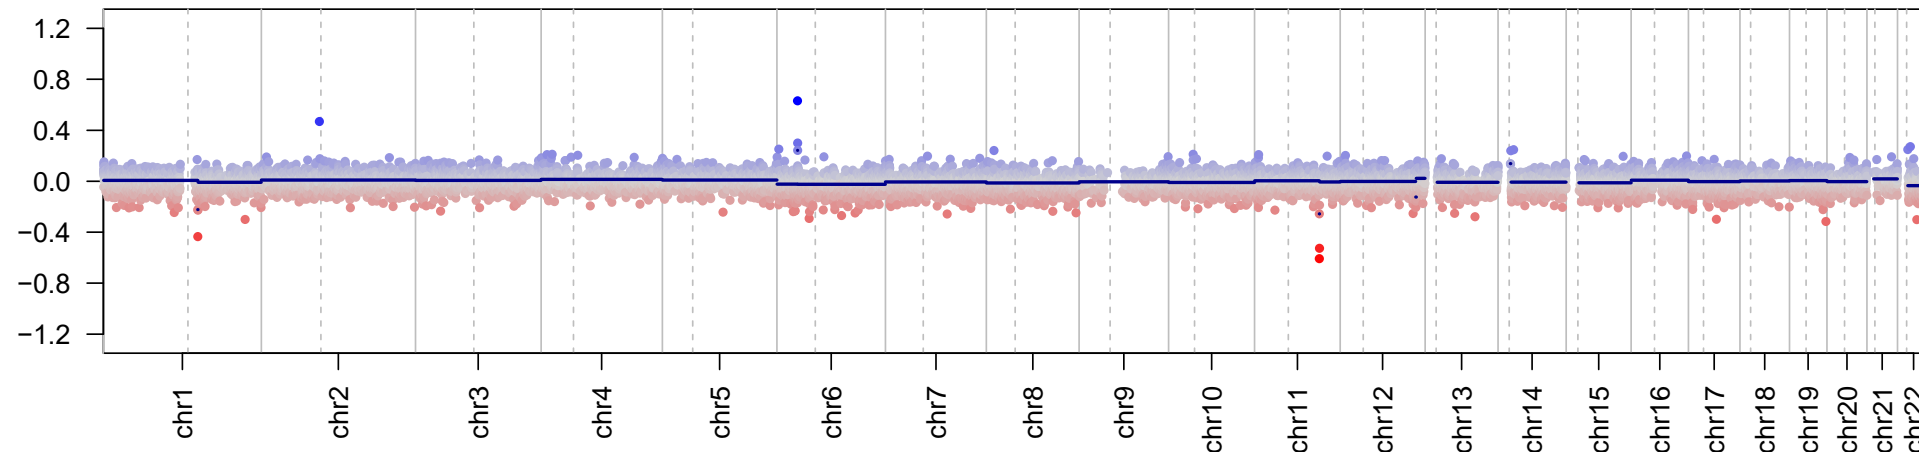

(A)

Ultrasonic aspirator I DX-BLN-037

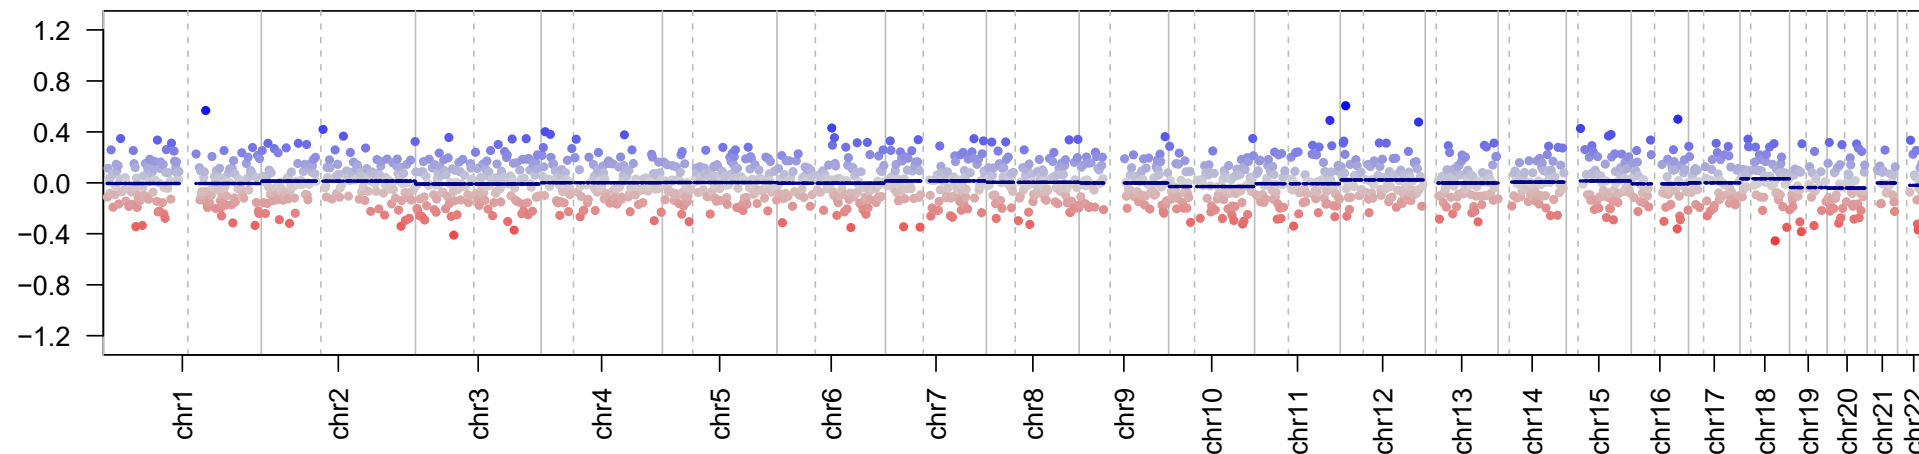

(B)

Microarray I DX-BLN-037

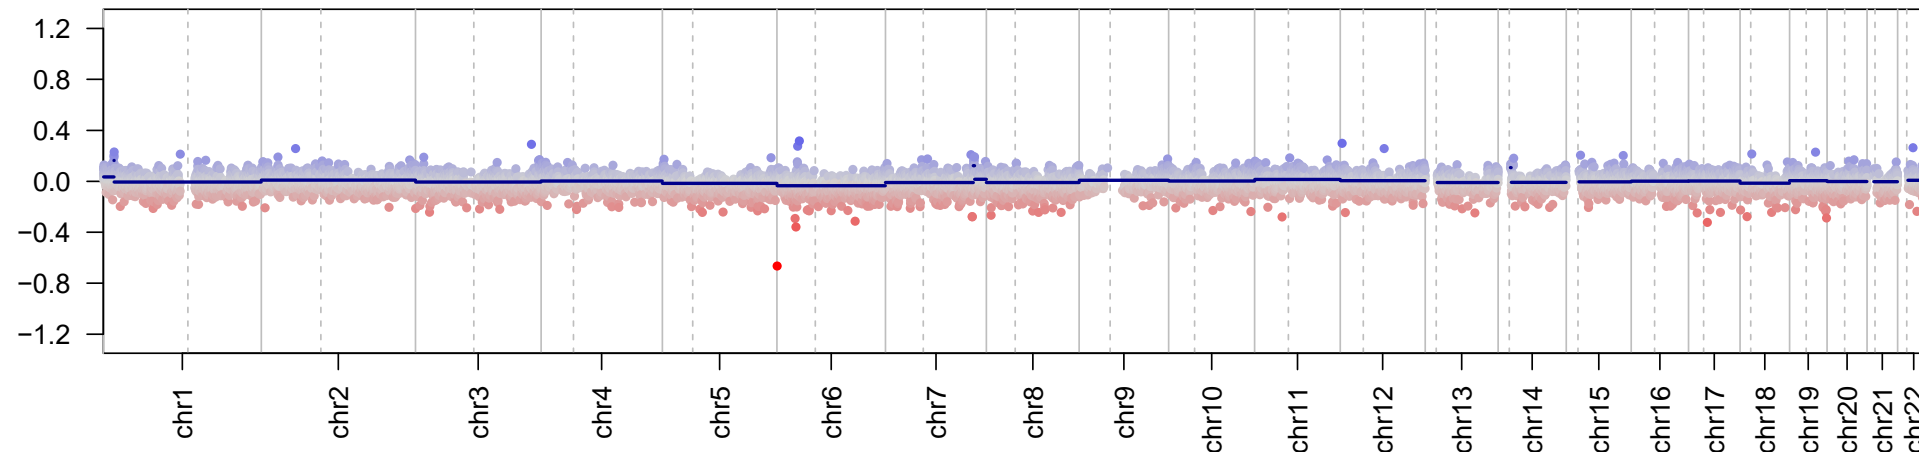

(A)

Ultrasonic aspirator I DX-BLN-042

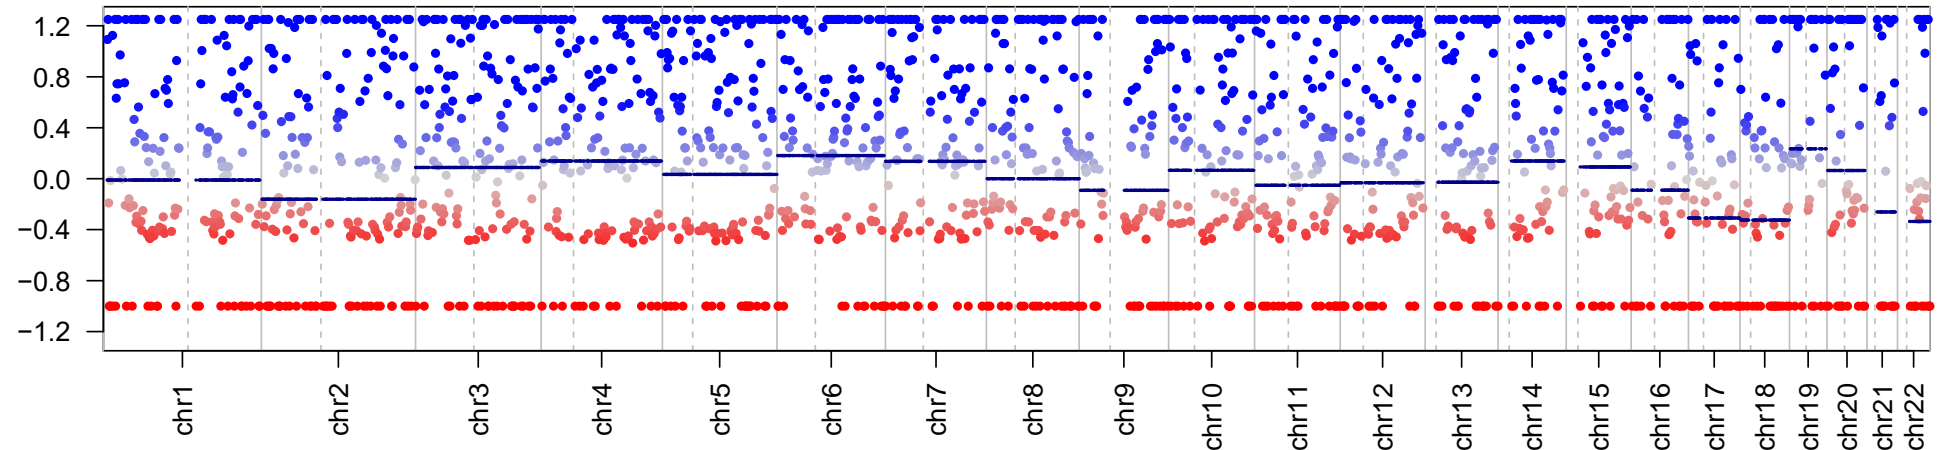

(B)

Microarray I DX-BLN-042

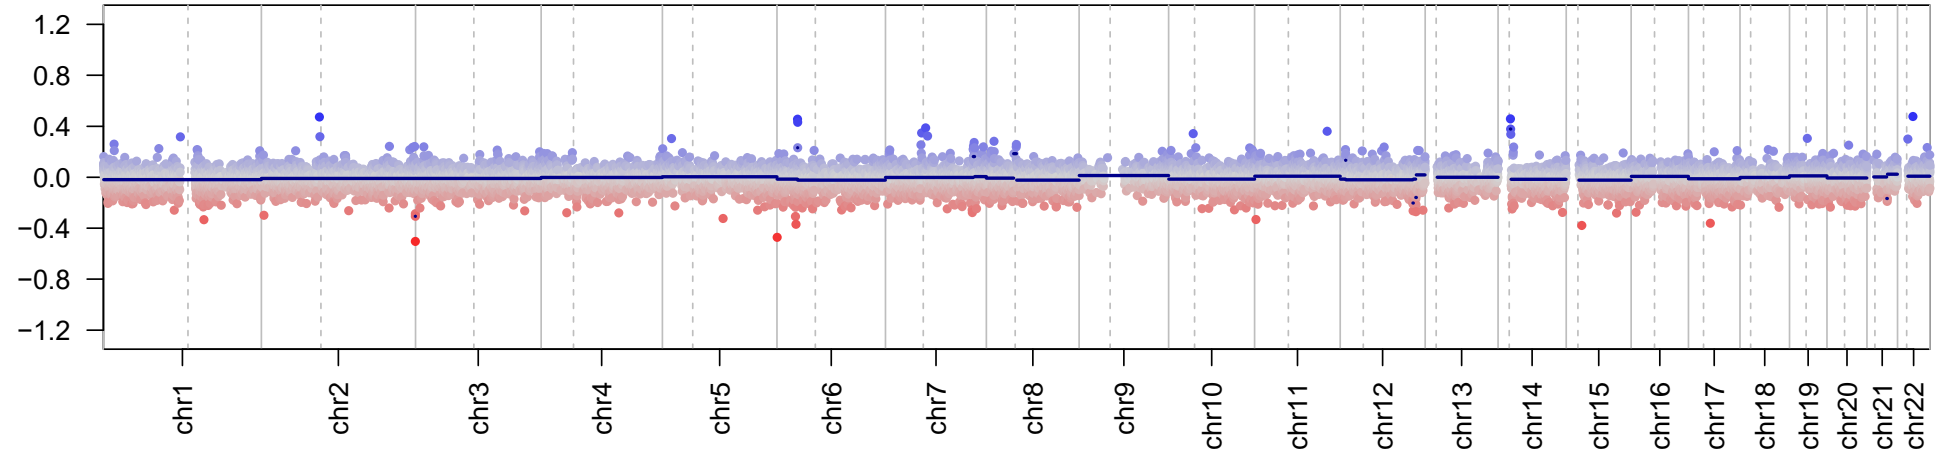

(A)

Ultrasonic aspirator I DX-BLN-043

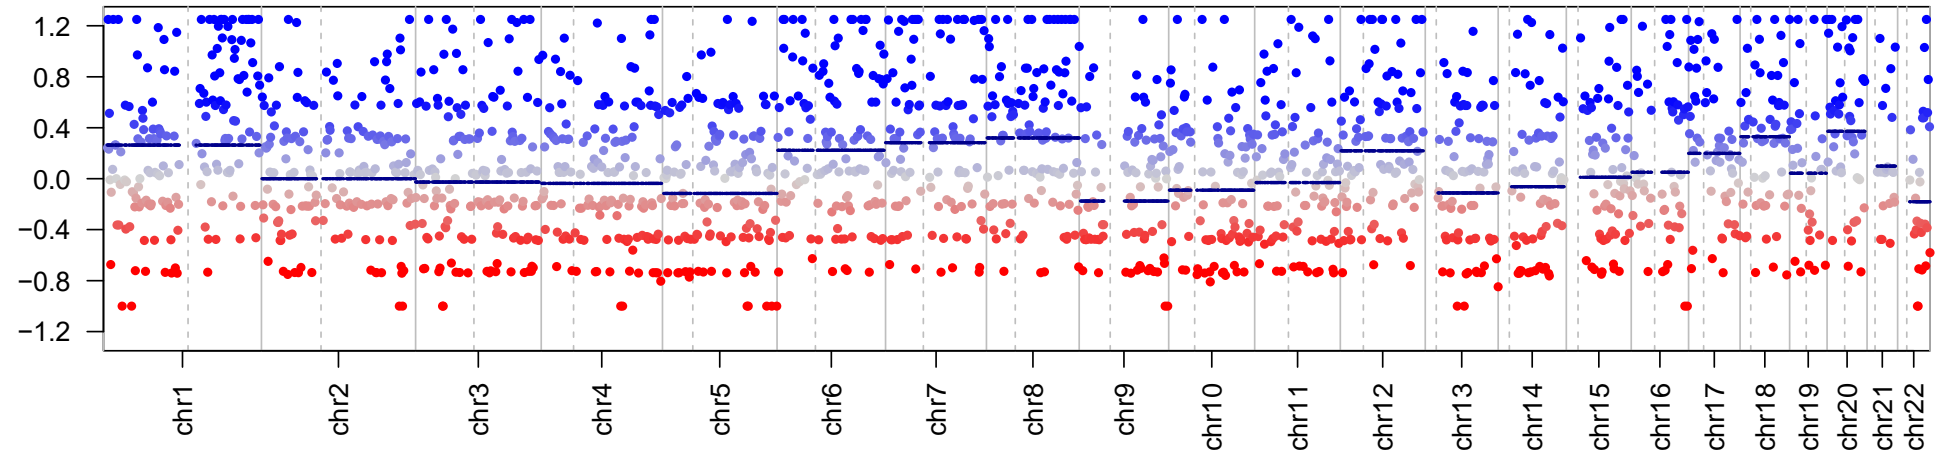

(B)

Microarray I DX-BLN-043

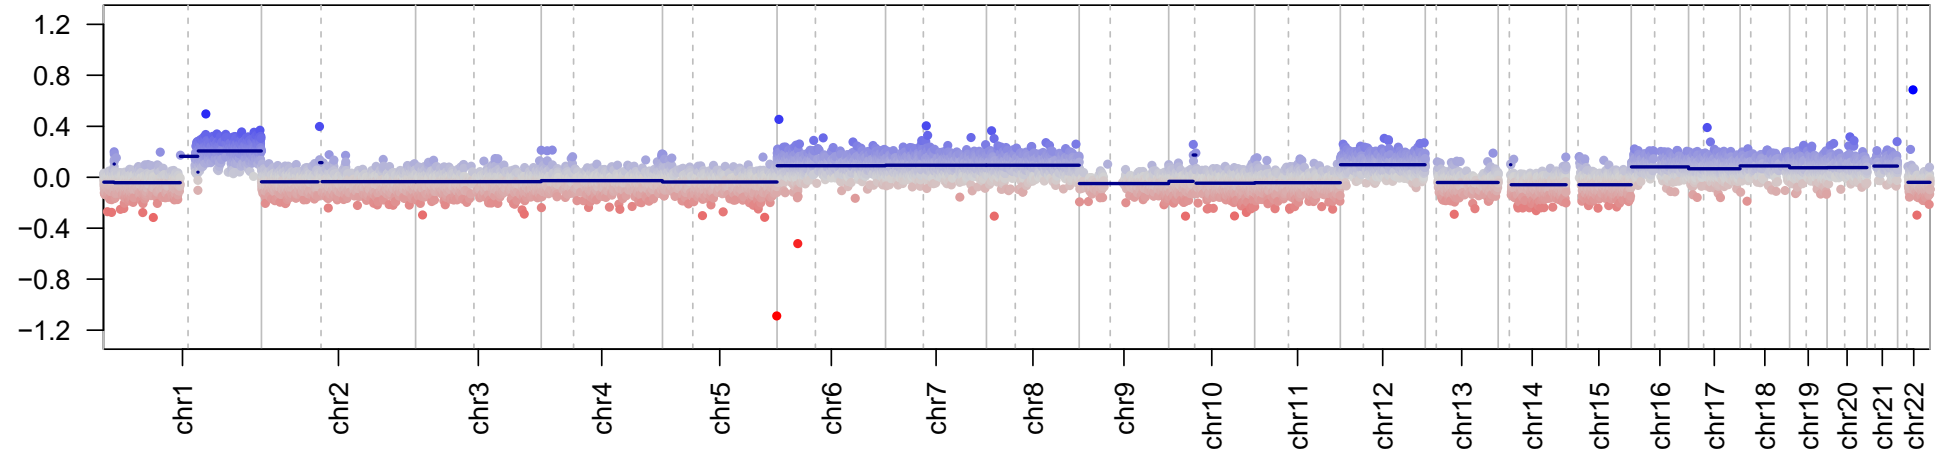

(A)

Ultrasonic aspirator I DX-BLN-044a

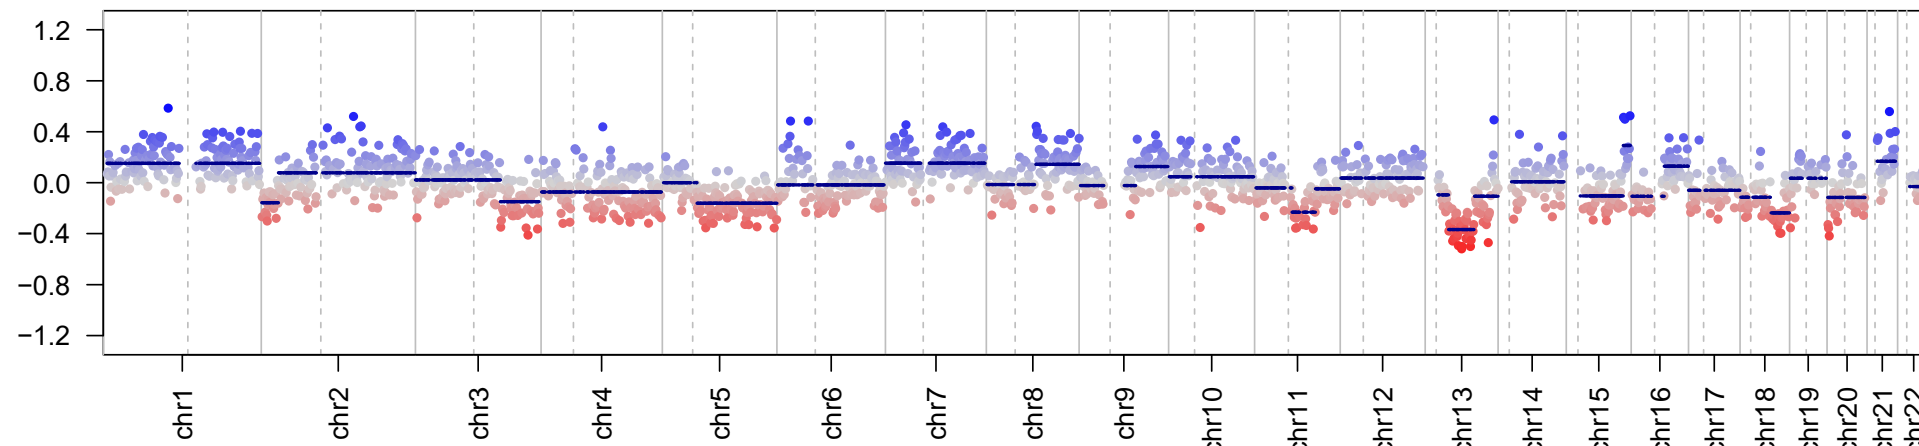

(B)

Microarray I DX-BLN-044a

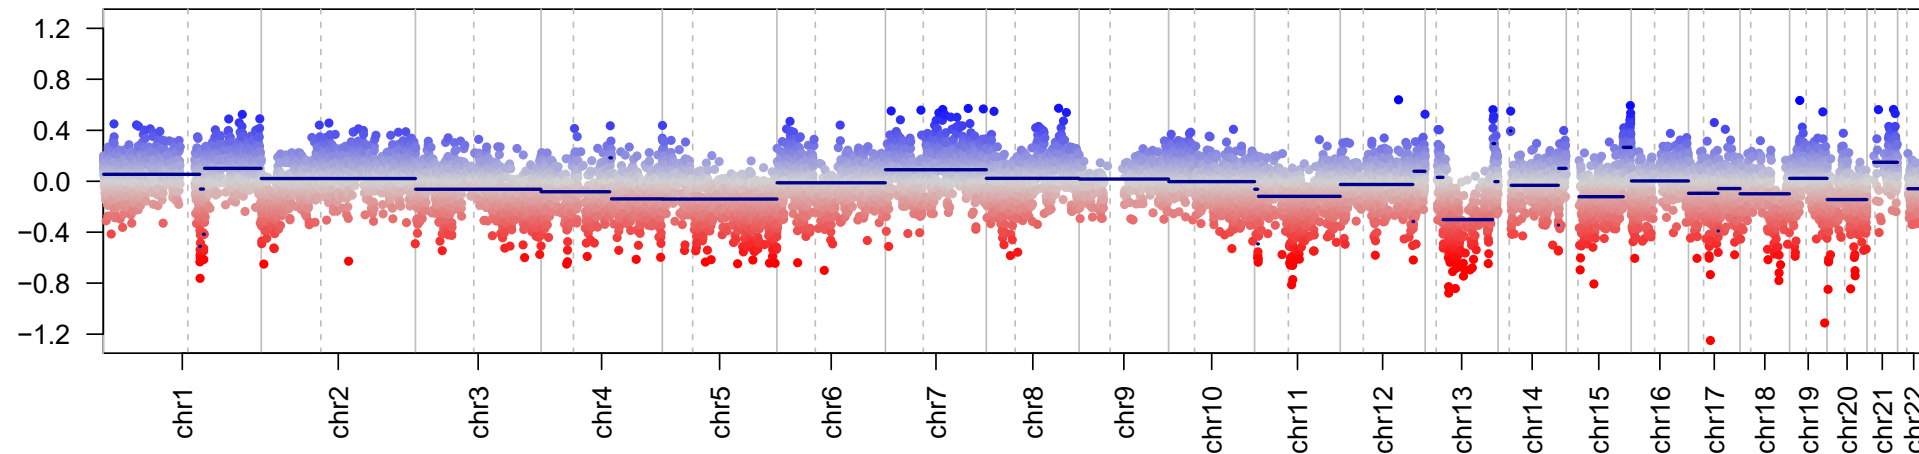

(A)

Ultrasonic aspirator I DX-BLN-047

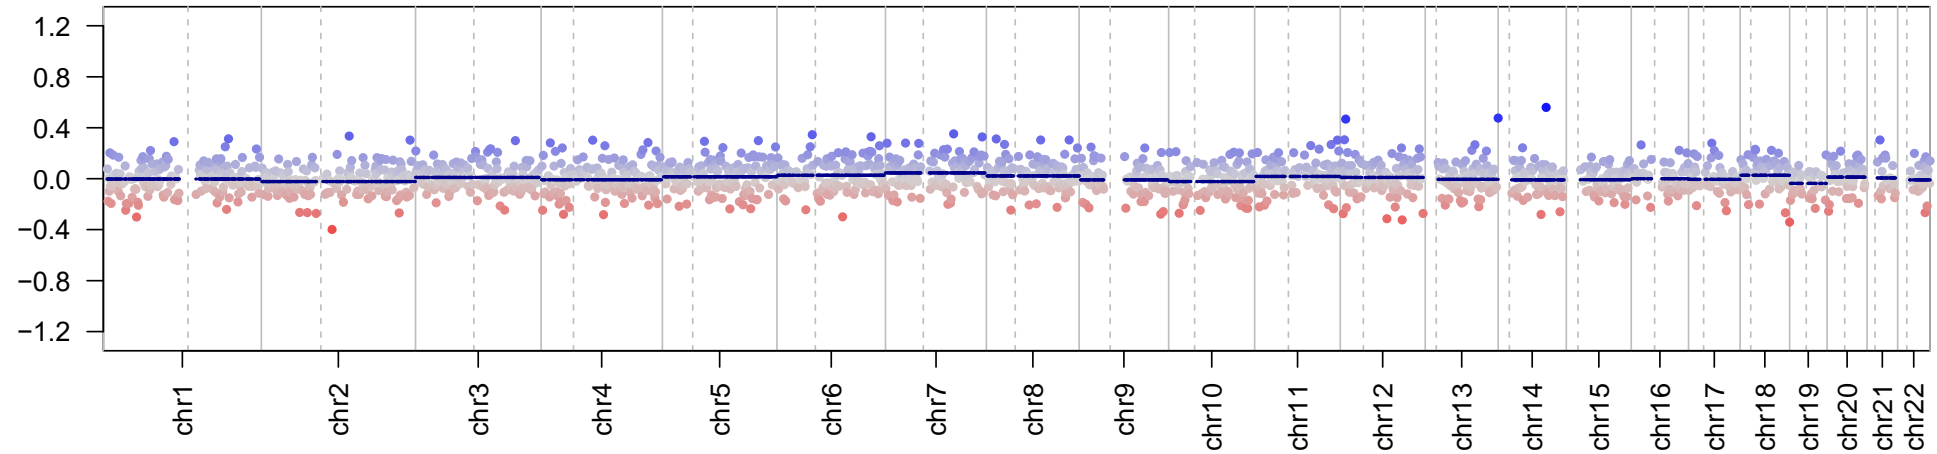

(B)

Microarray I DX-BLN-047

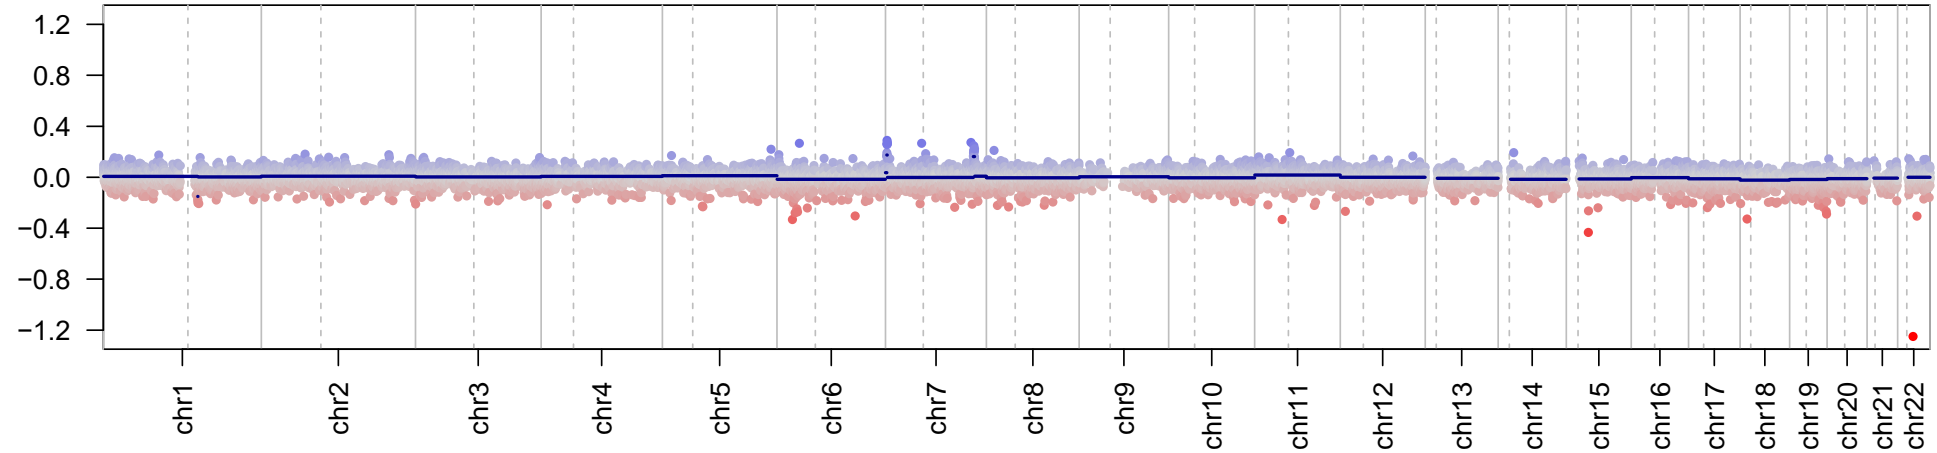



(A)

Ultrasonic aspirator I DX-BLN-048

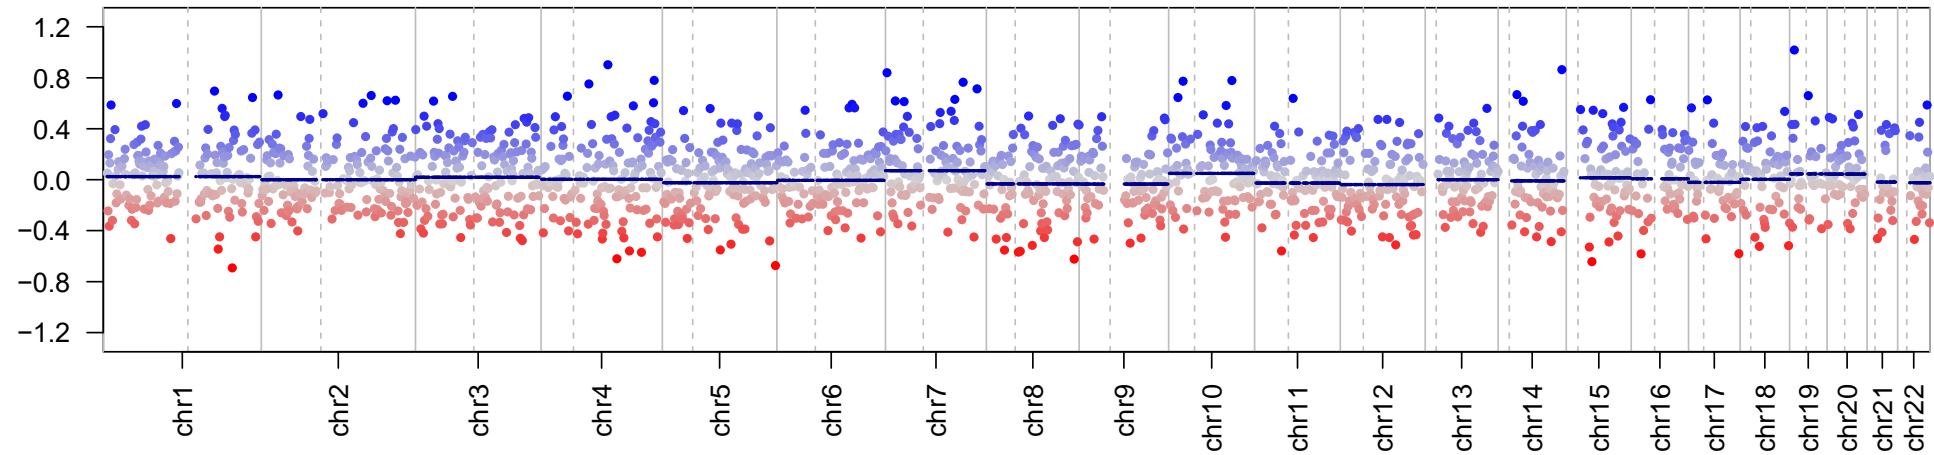

(B)

Microarray I DX-BLN-048

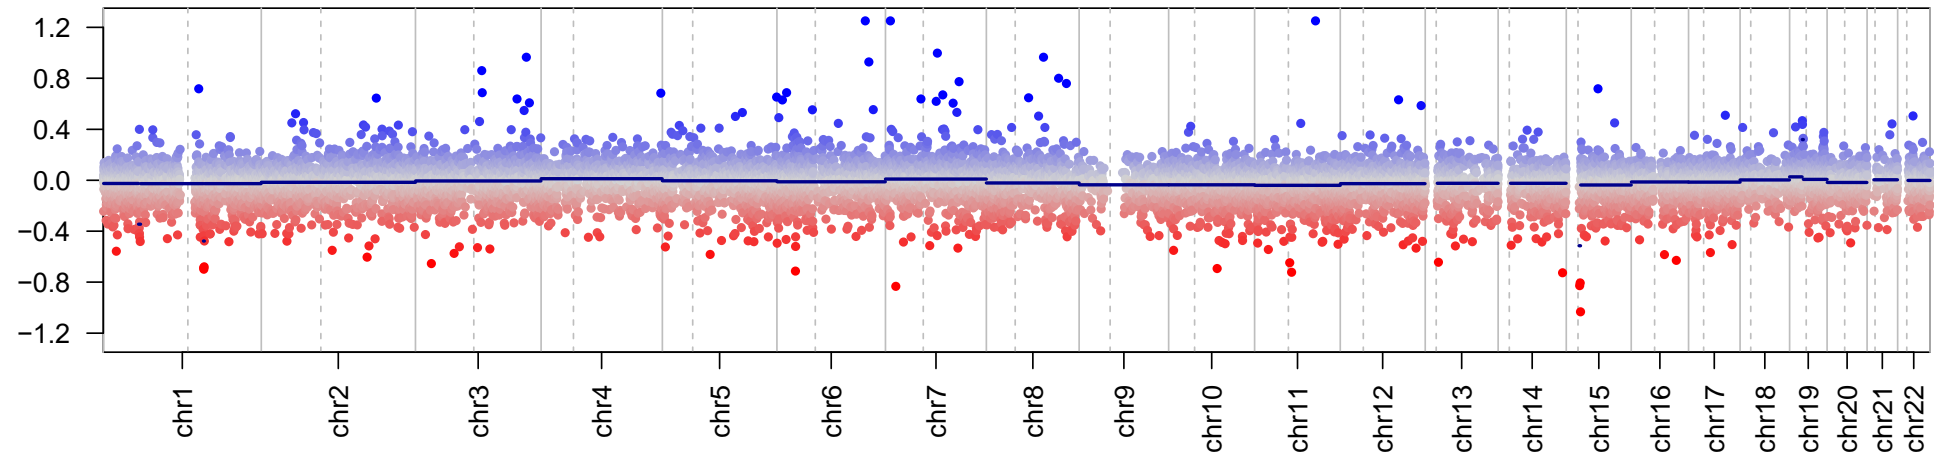

(A)

Ultrasonic aspirator I DX-BLN-049a

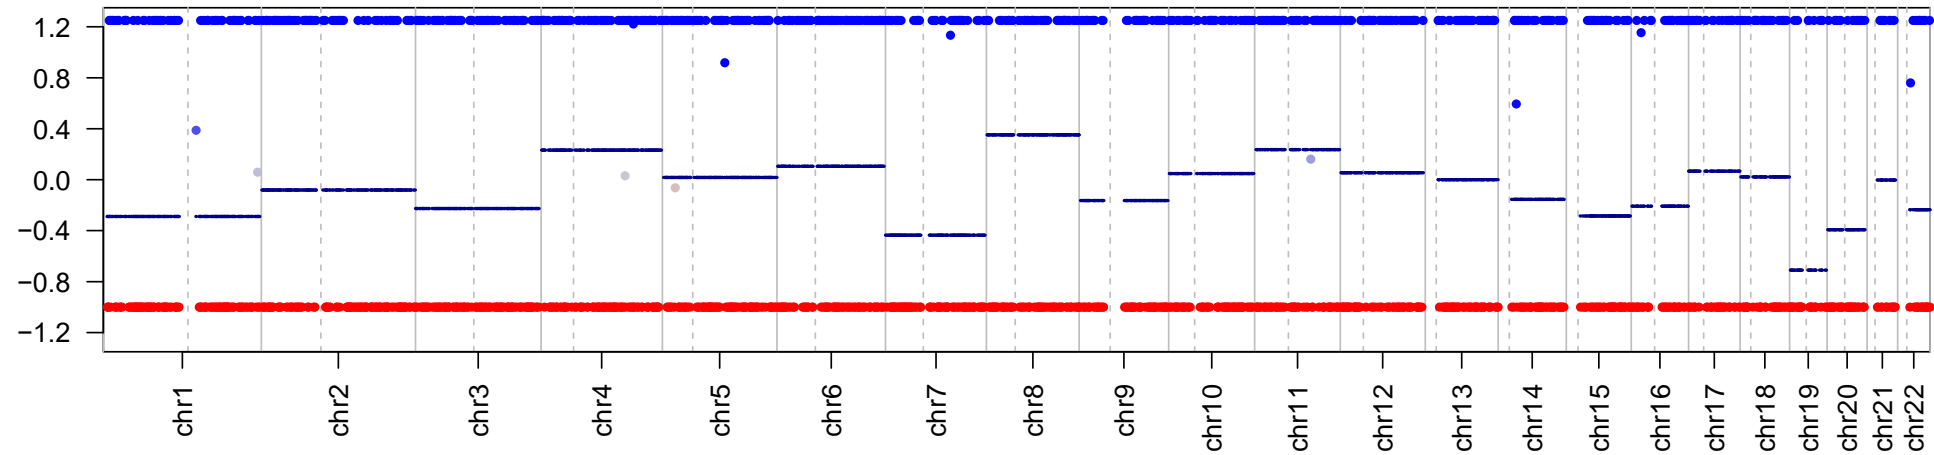

(B)

Microarray I DX-BLN-049a

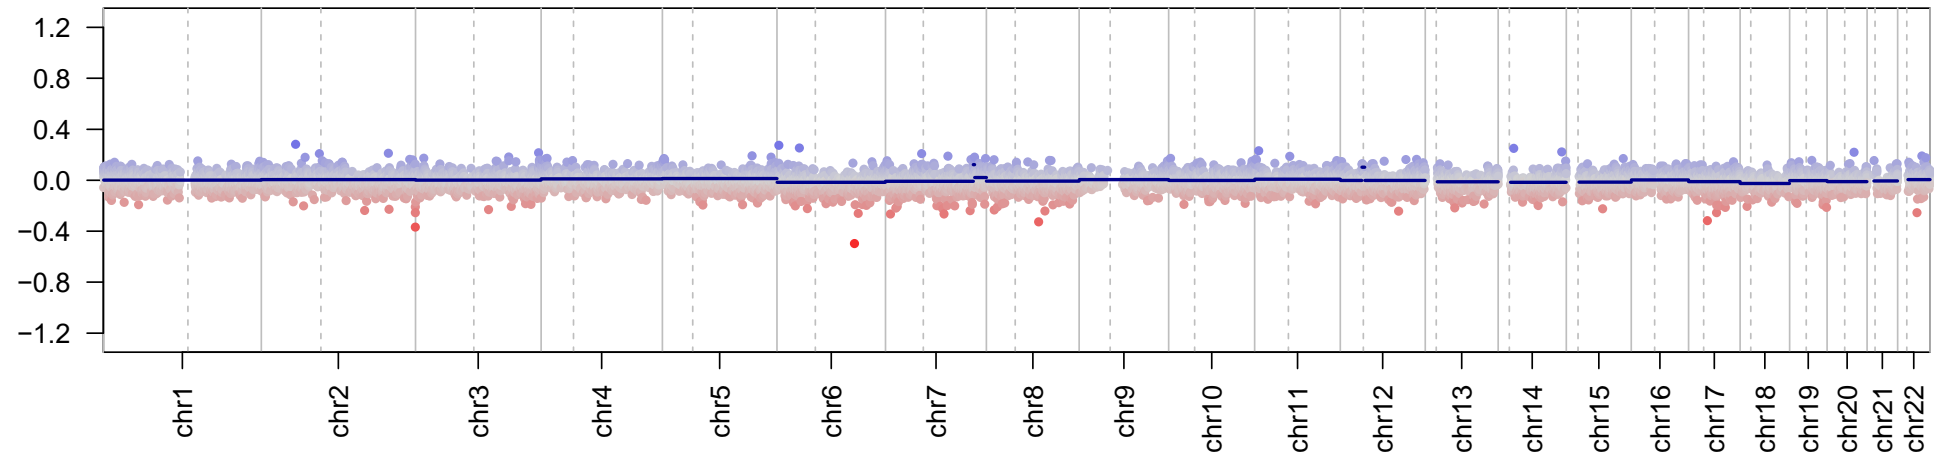

(A)

Ultrasonic aspirator I DX-BLN-050

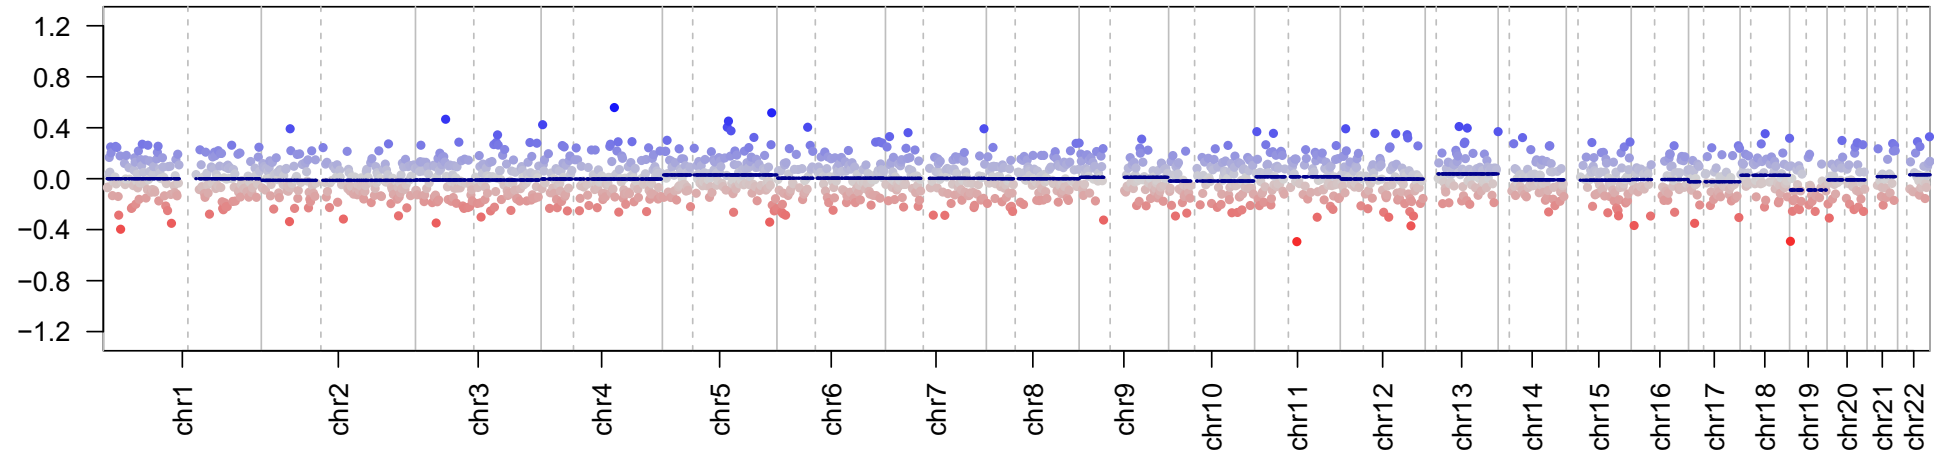

(B)

Microarray I DX-BLN-050

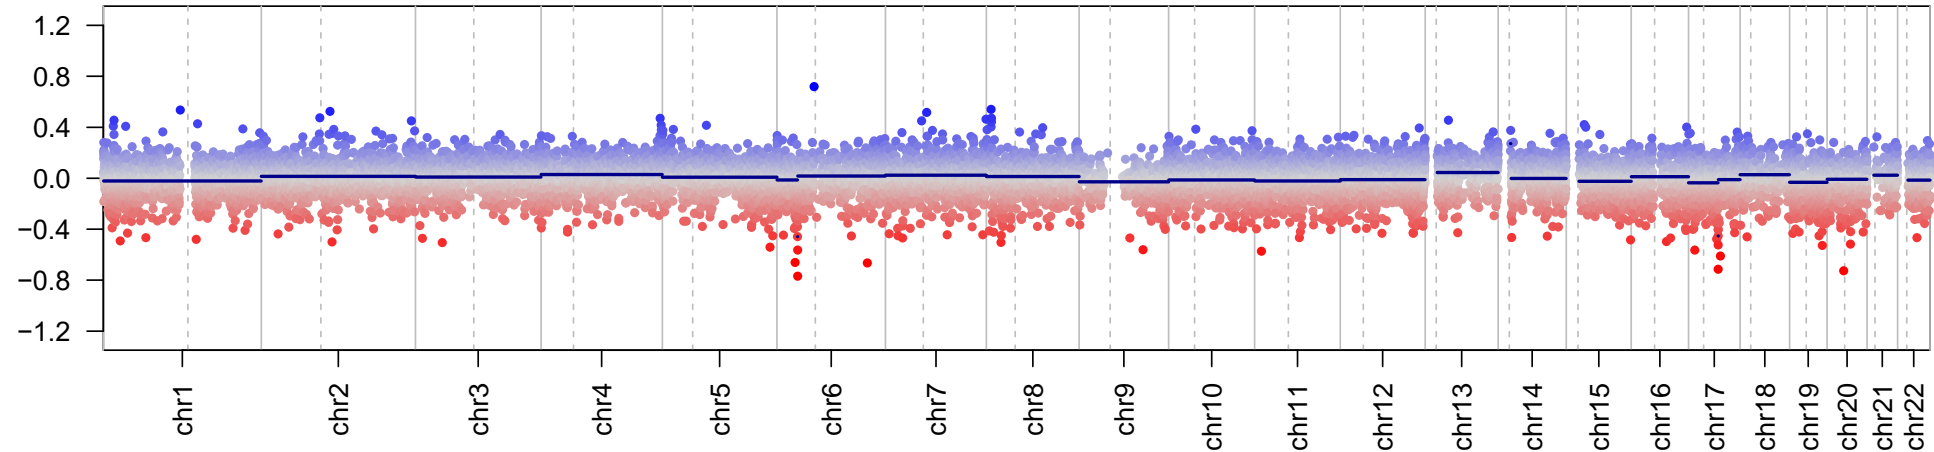

(A)

Ultrasonic aspirator I DX-BLN-054

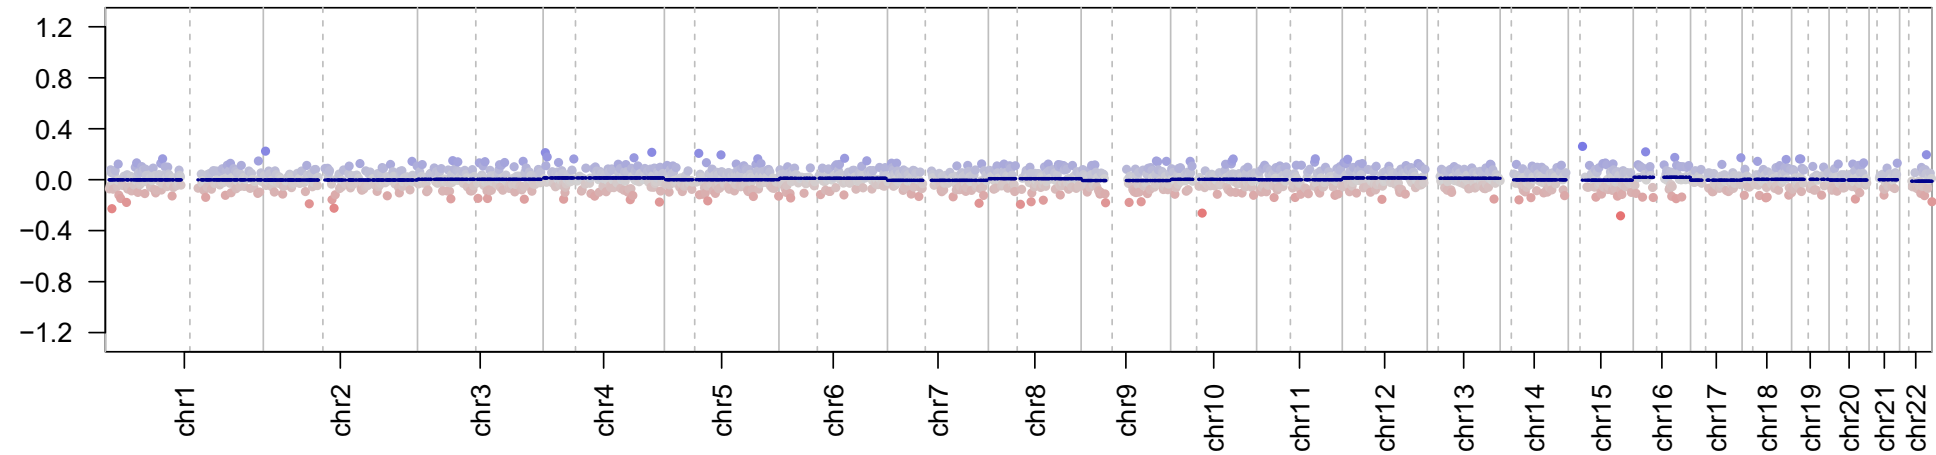

(B)

Microarray I DX-BLN-054

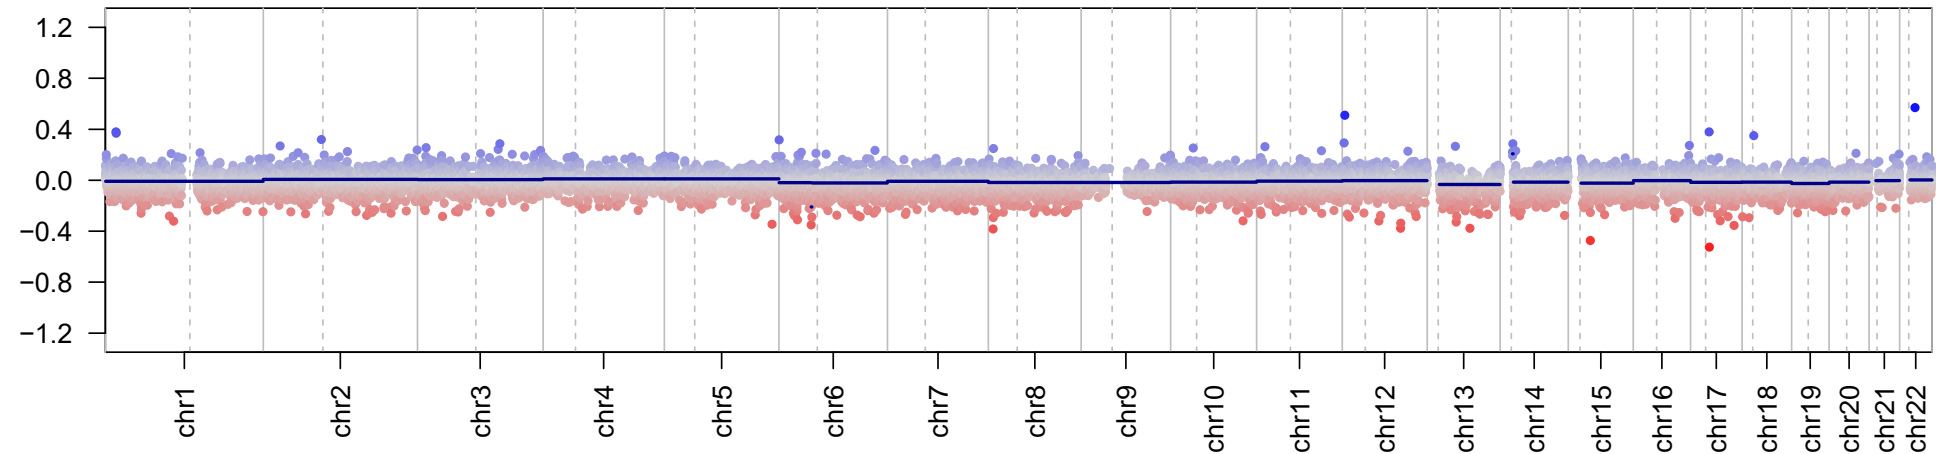

(A)

Ultrasonic aspirator I DX-BLN-057

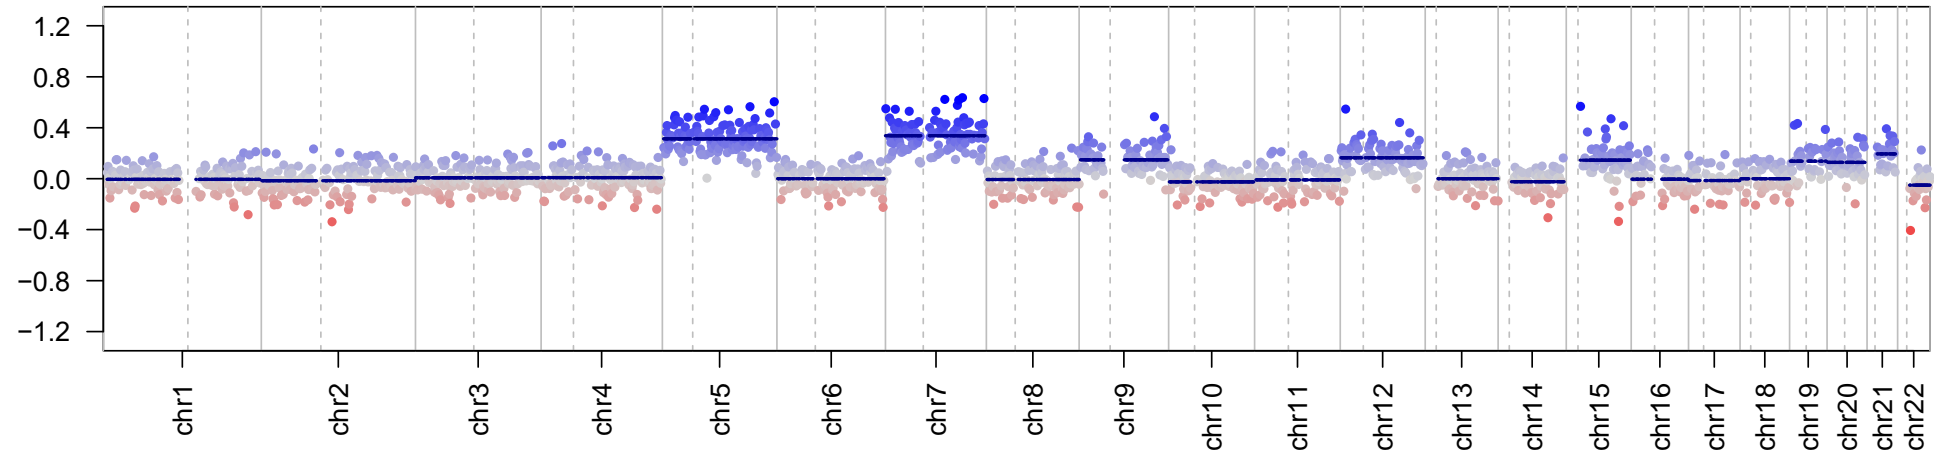

(B)

Microarray I DX-BLN-057

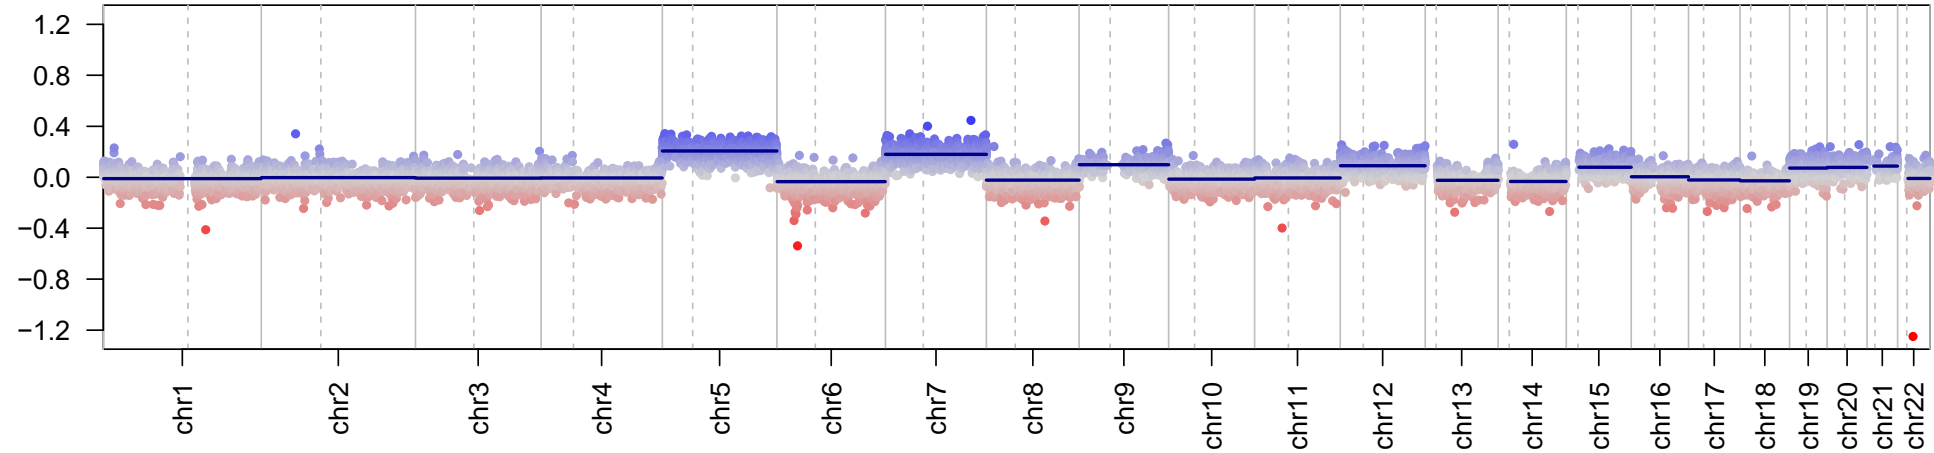

(A)

Ultrasonic aspirator I DX-BLN-064

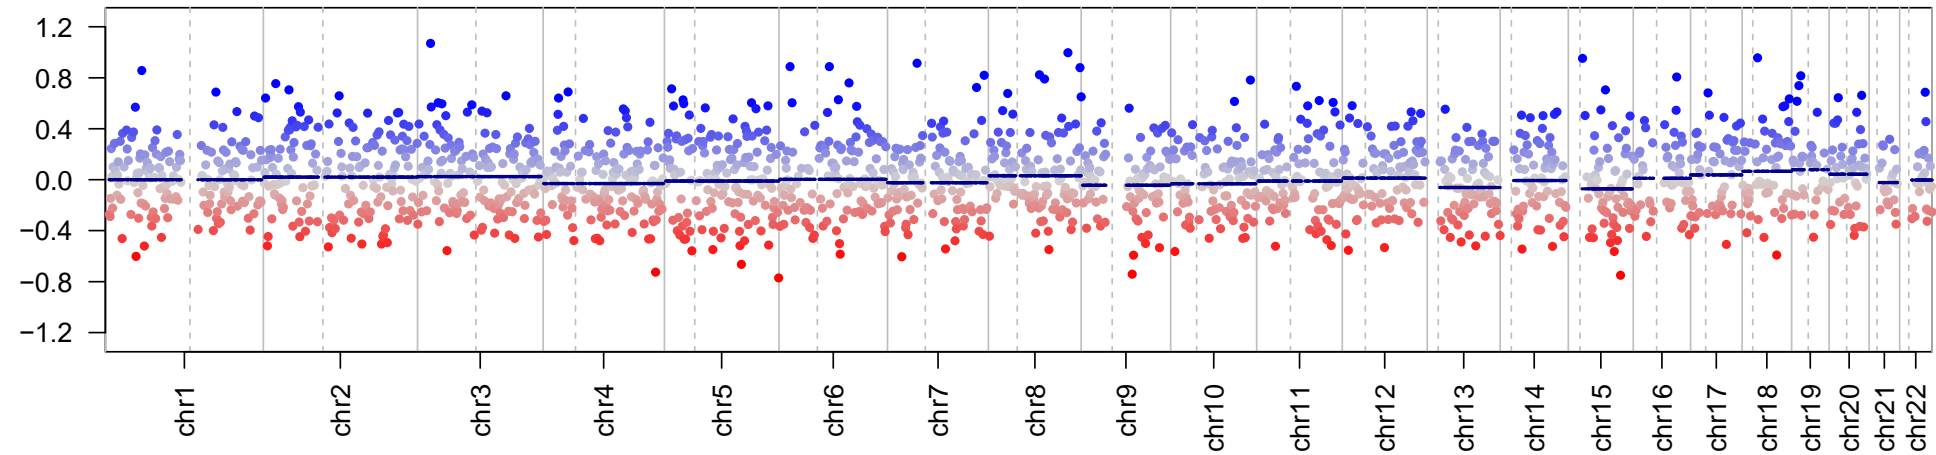

(B)

Microarray I DX-BLN-064

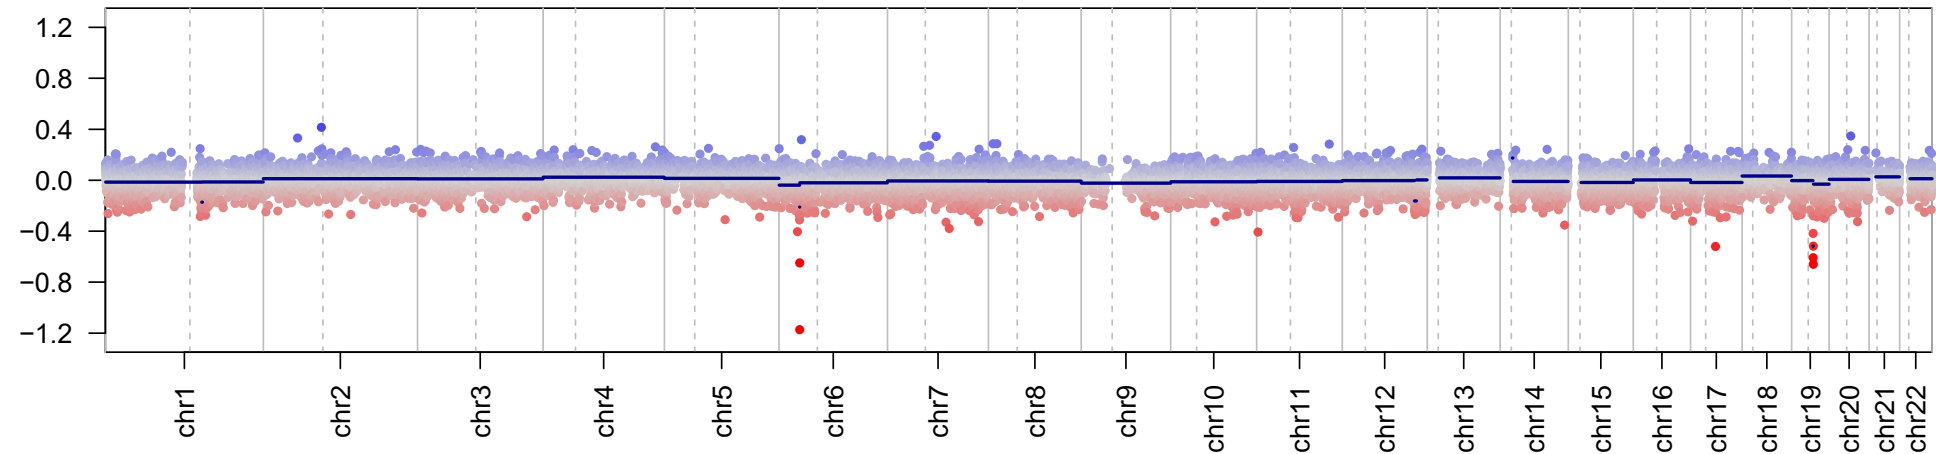

(A)

Ultrasonic aspirator I DX-BLN-065

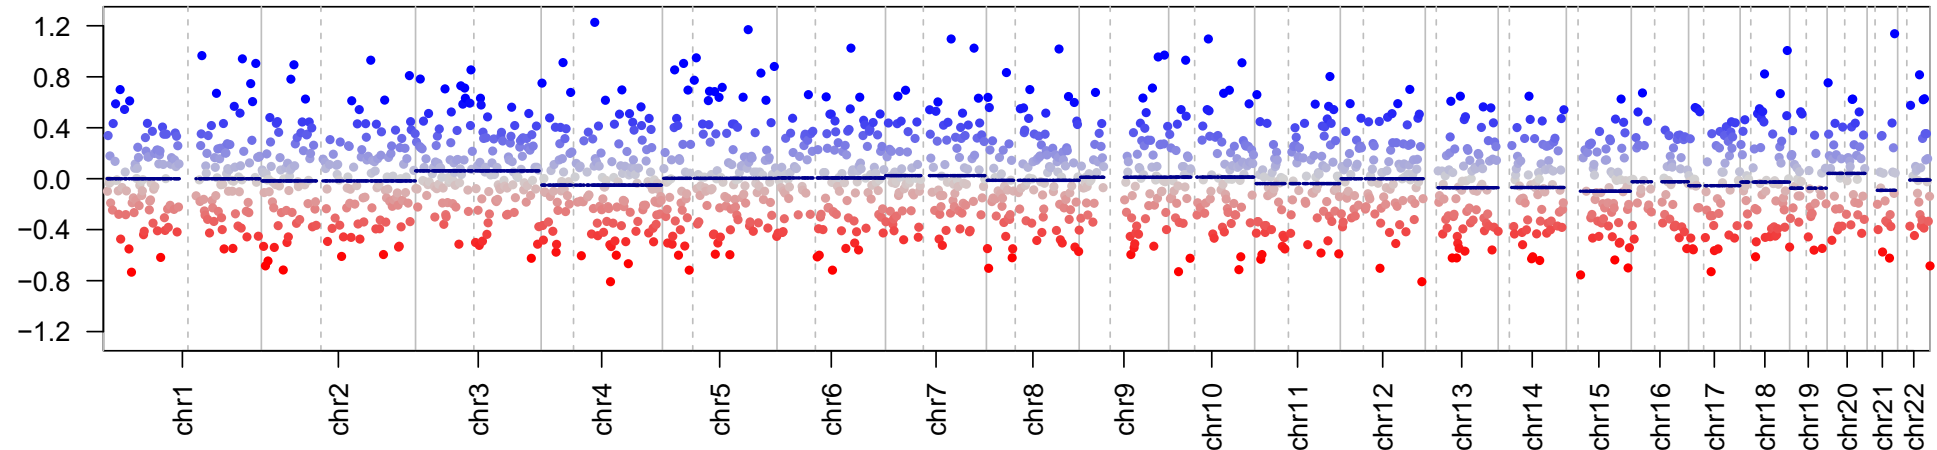

(B)

Microarray I DX-BLN-065

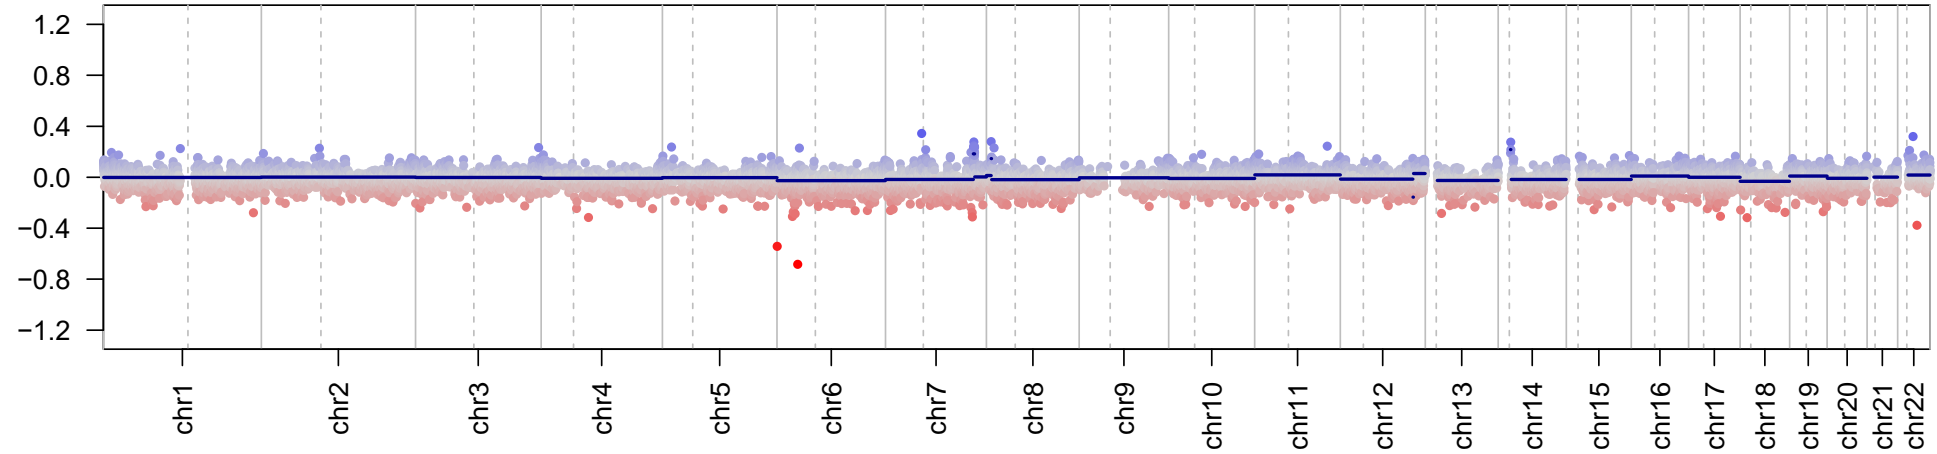



(A)

Ultrasonic aspirator I DX-BLN-071

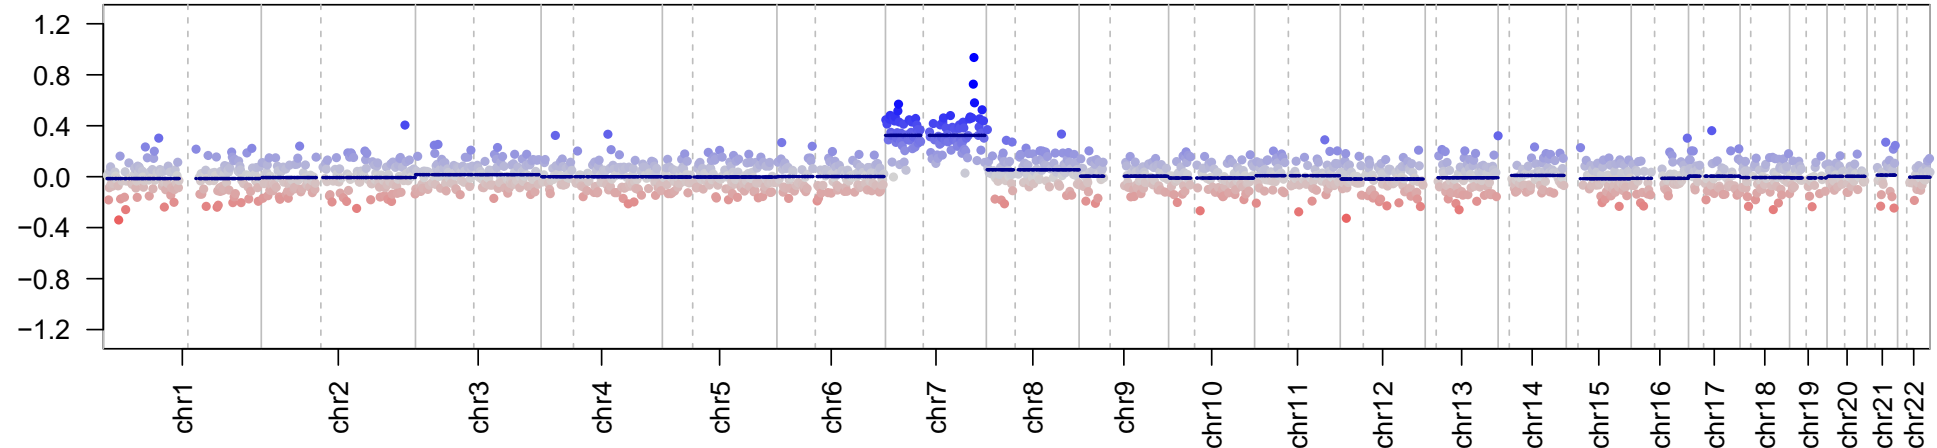

(B)

Microarray I DX-BLN-071

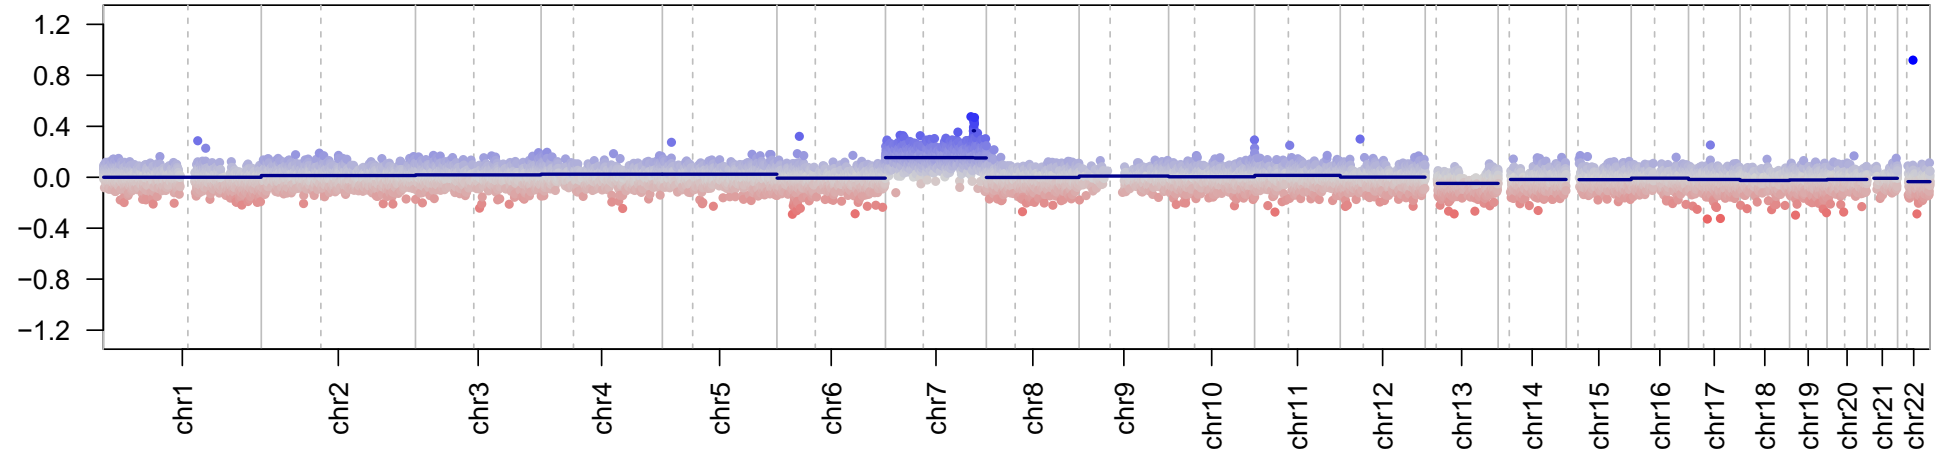

**(A)**

**Ultrasonic aspirator I DX-BLN-072**

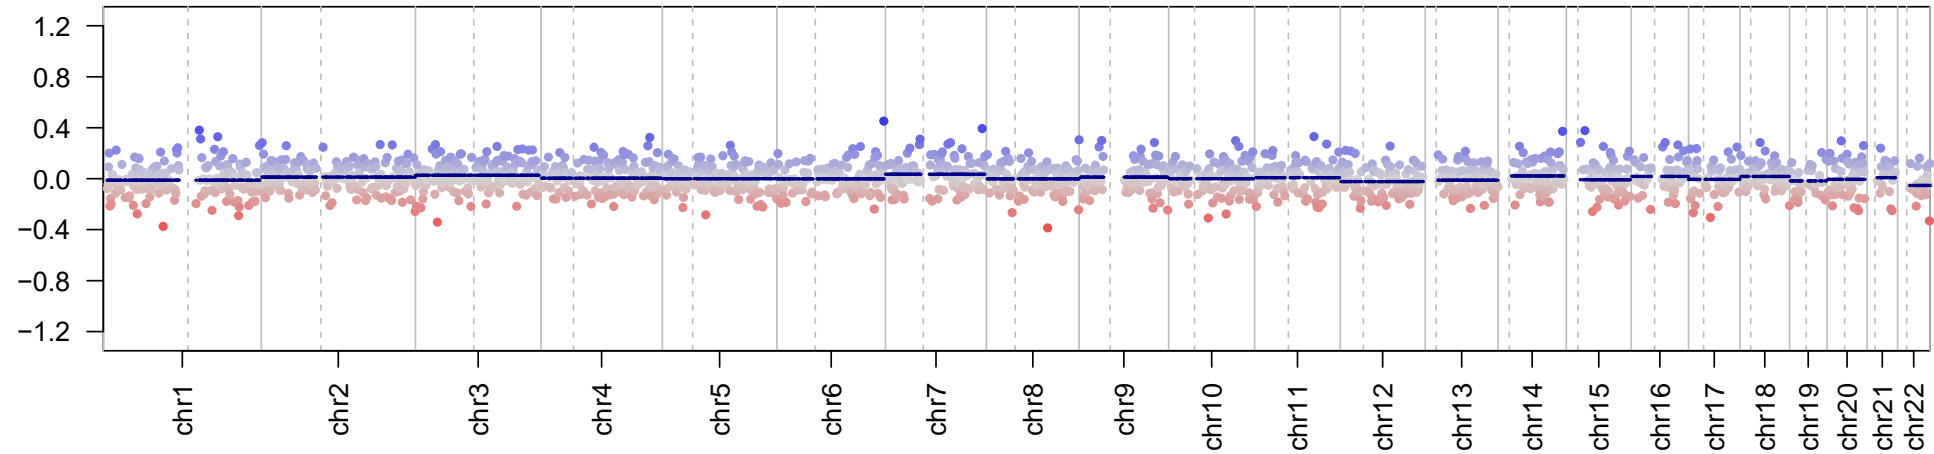

**(B)**

**Microarray I DX-BLN-072**

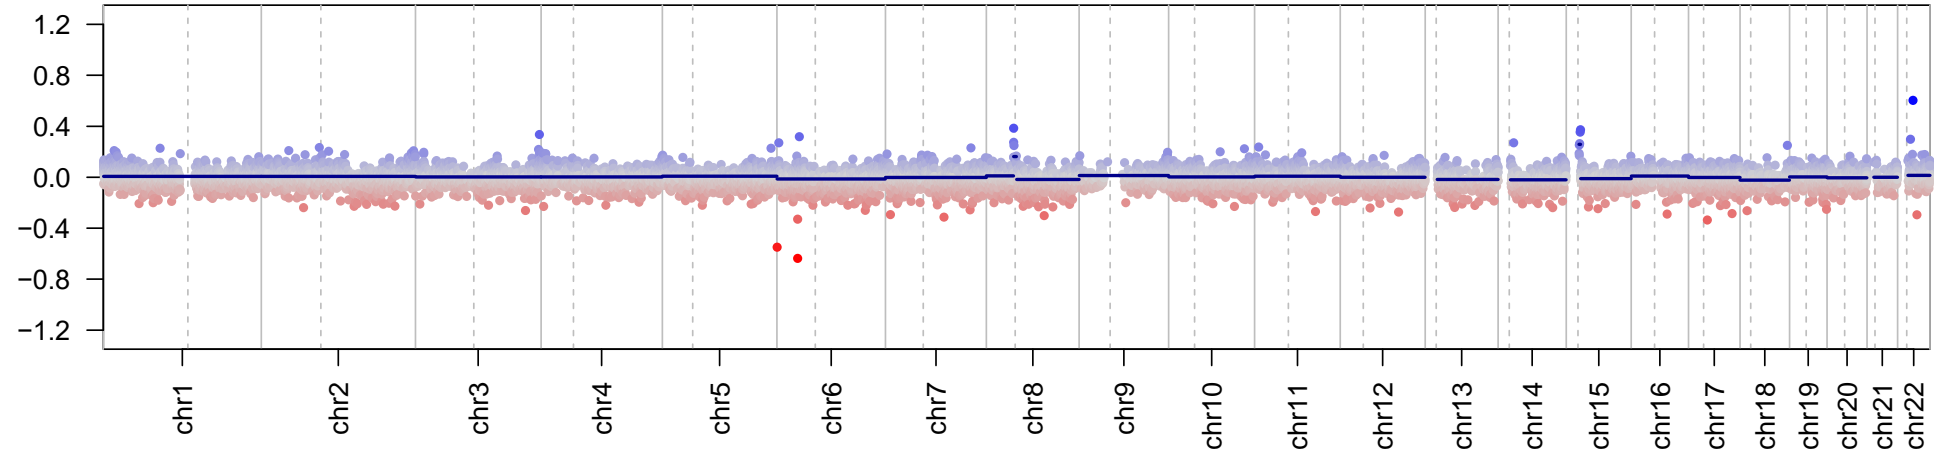

(A)

Ultrasonic aspirator I DX-BLN-074

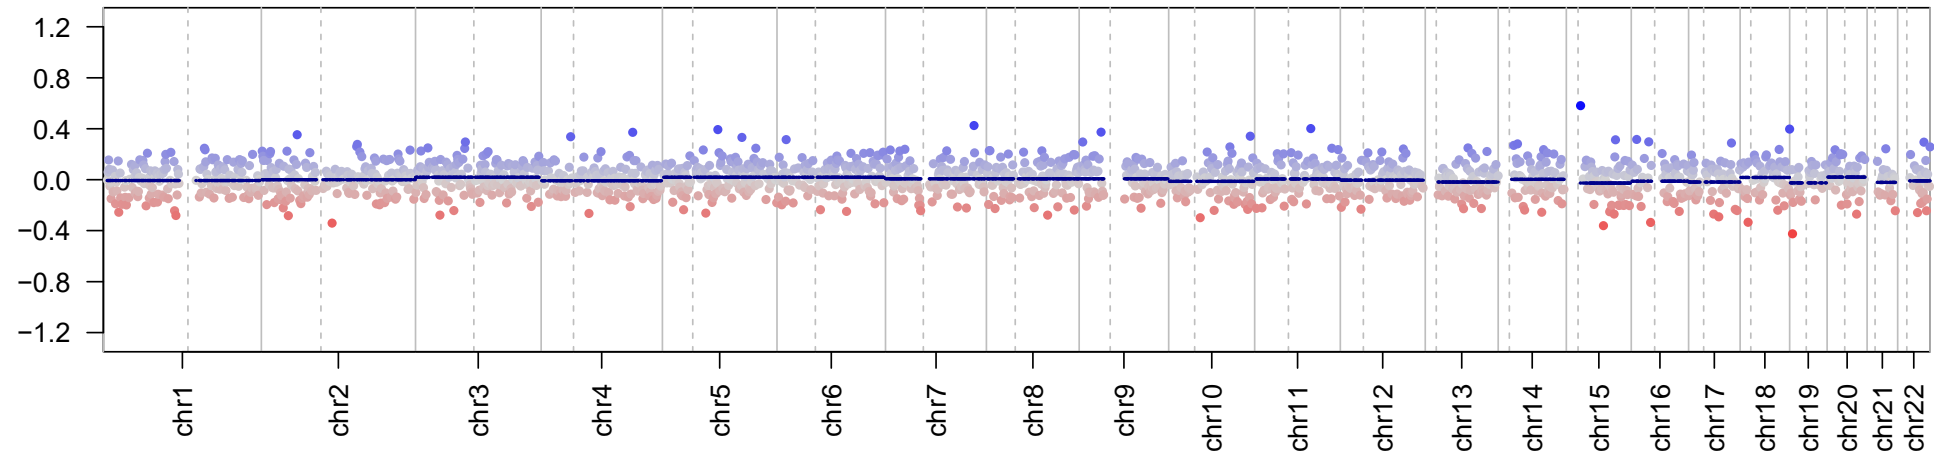

(B)

Microarray I DX-BLN-074

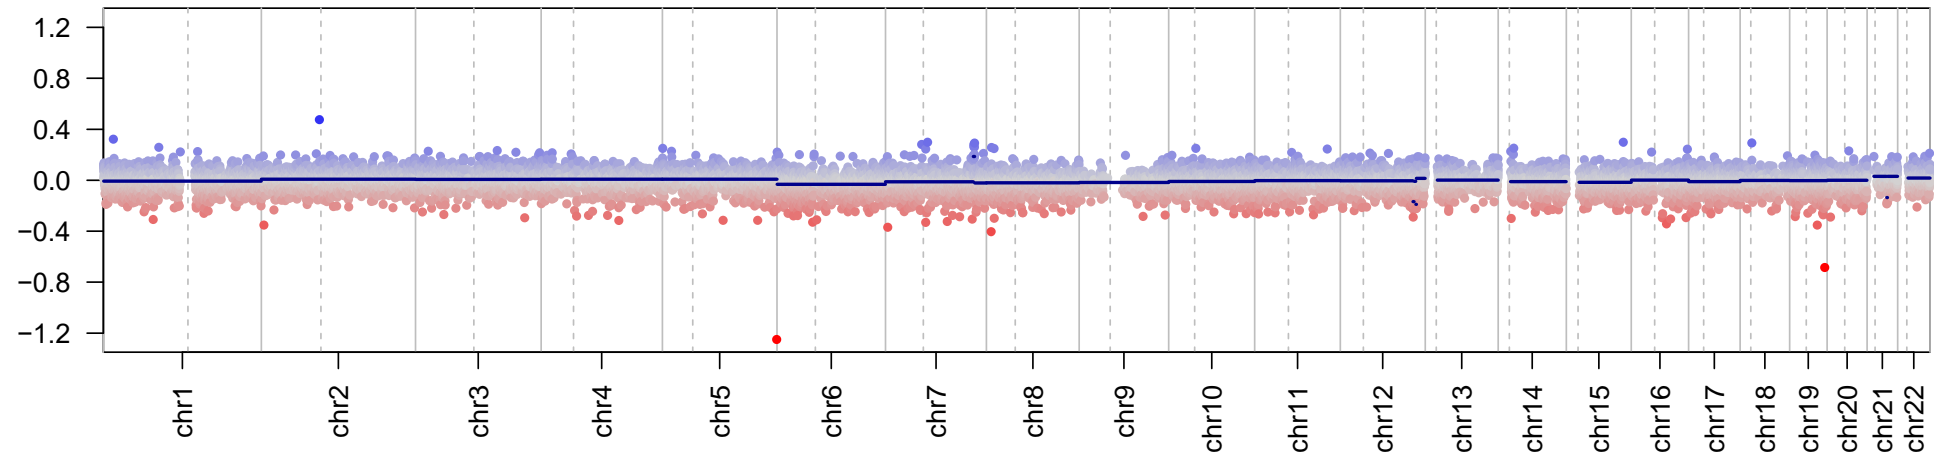

(A)

Ultrasonic aspirator I DX-BLN-075

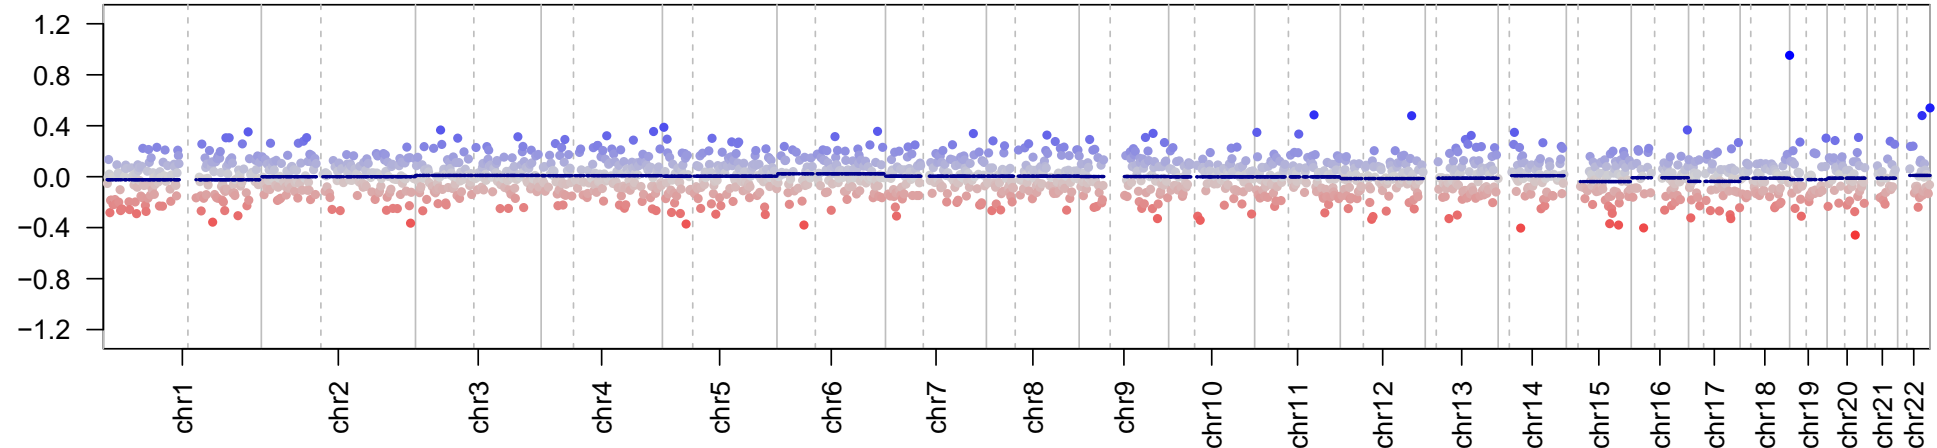

(B)

Microarray I DX-BLN-075

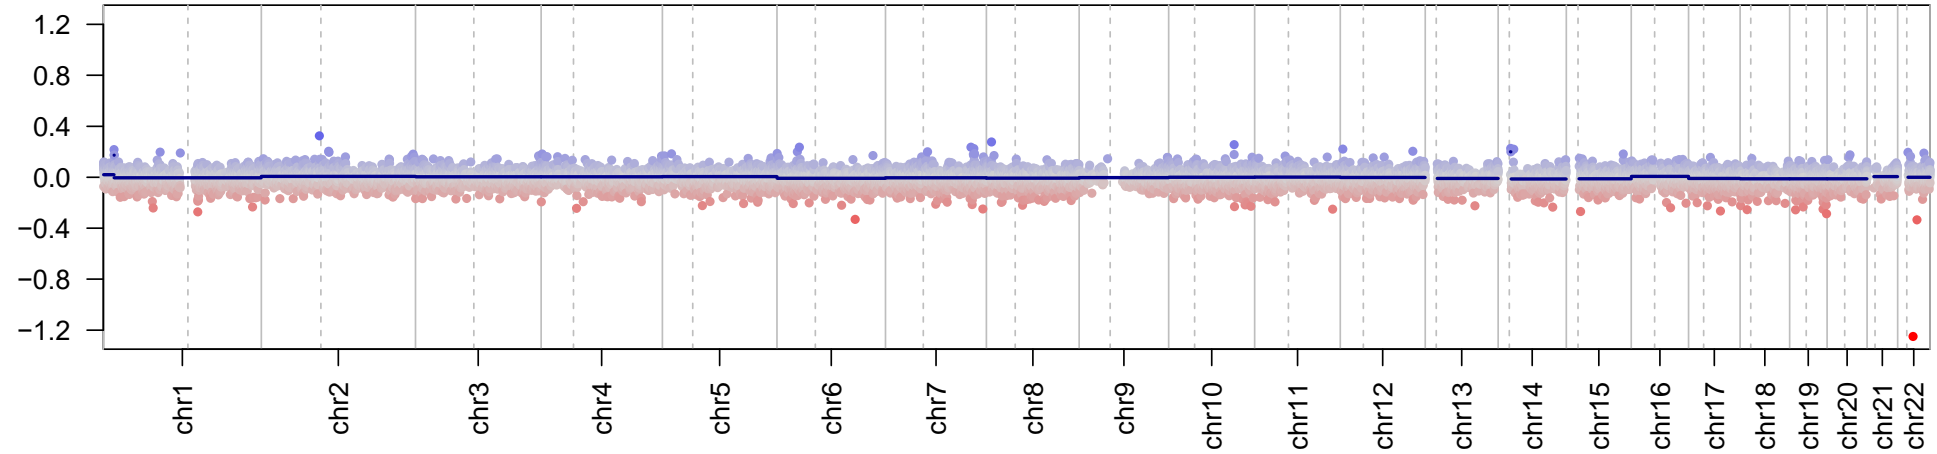

| Patient ID | Sex | CNS WHO 2016                     | Microarray methylation class                                     | Probability score | Nanopore methylation class family       | tSNE methylation class family concordance | Nanopore methylation class                                       | tSNE methylation class concordance |
|------------|-----|----------------------------------|------------------------------------------------------------------|-------------------|-----------------------------------------|-------------------------------------------|------------------------------------------------------------------|------------------------------------|
| DX-BLN-025 | F   | CNS neuroblastoma                | CNS neuroblastoma with FOXR2 activation                          | 0,682             | CNS neuroblastoma with FOXR2 activation | +                                         | CNS neuroblastoma with FOXR2 activation                          | +                                  |
| DX-BLN-027 | F   | Schwannoma                       | schwannoma                                                       | 0,854             | schwannoma                              | +                                         | schwannoma                                                       | +                                  |
| DX-BLN-028 | F   | Pilocytic astrocytoma            | low grade glioma, subclass posterior fossa pilocytic astrocytoma | 0,583             | pilocytic astrocytoma                   | +                                         | low grade glioma, subclass posterior fossa pilocytic astrocytoma | +                                  |
| DX-BLN-029 | F   | Ependymoma                       | ependymoma, YAP fusion                                           | 0,101             | glioblastoma, IDH wildtype              | +                                         | ependymoma, YAP fusion                                           | +                                  |
| DX-BLN-037 | F   | Pilocytic astrocytoma            | low grade glioma, subclass posterior fossa pilocytic astrocytoma | 0,539             | pilocytic astrocytoma                   | +                                         | low grade glioma, subclass posterior fossa pilocytic astrocytoma | +                                  |
| DX-BLN-042 | F   | Pilocytic astrocytoma            | low grade glioma, subclass posterior fossa pilocytic astrocytoma | 0,557             | pilocytic astrocytoma                   | +                                         | low grade glioma, subclass posterior fossa pilocytic astrocytoma | +                                  |
| DX-BLN-043 | M   | Ependymoma, RELA fusion-positive | ependymoma, RELA fusion                                          | 0,428             | ependymoma, RELA fusion                 | +                                         | ependymoma, RELA fusion                                          | +                                  |
| DX-BLN-047 | F   | Pilocytic astrocytoma            | low grade glioma, subclass posterior fossa pilocytic astrocytoma | 0,5               | pilocytic astrocytoma                   | +                                         | low grade glioma, subclass posterior fossa pilocytic astrocytoma | +                                  |
| DX-        | M   | Anaplastic                       | ependymoma,                                                      | 0,754             | ependymoma,                             | +                                         | ependymoma,                                                      | +                                  |

|            |   |                                     |                                                                  |       |                                                       |   |                                                                  |   |
|------------|---|-------------------------------------|------------------------------------------------------------------|-------|-------------------------------------------------------|---|------------------------------------------------------------------|---|
| BLN-048    |   | Ependymoma                          | posterior fossa group A                                          |       | posterior fossa group A                               |   | posterior fossa group A                                          |   |
| DX-BLN-049 | F | Pilocytic astrocytoma               | low grade glioma, subclass posterior fossa pilocytic astrocytoma | 0,12  | pilocytic astrocytoma                                 | - | low grade glioma, subclass midline pilocytic astrocytoma         | - |
| DX-BLN-050 | F | Atypical central neurocytoma        | central neurocytoma                                              | 0,721 | central neurocytoma                                   | + | central neurocytoma                                              | + |
| DX-BLN-054 | F | Diffuse astrocytoma, IDH-mutant     | IDH glioma, subclass astrocytoma                                 | 0,166 | pilocytic astrocytoma                                 | - | control tissue, hemispheric cortex                               | - |
| DX-BLN-064 | F | Subependymal giant cell astrocytoma | #NV                                                              | 0,15  | low grade glioma, subependymal giant cell astrocytoma | - | low grade glioma, subependymal giant cell astrocytoma            | - |
| DX-BLN-065 | M | Pilocytic astrocytoma               | low grade glioma, subclass posterior fossa pilocytic astrocytoma | 0,472 | pilocytic astrocytoma                                 | + | low grade glioma, subclass posterior fossa pilocytic astrocytoma | + |
| DX-BLN-071 | F | Pilocytic astrocytoma               | #NV                                                              | 0,485 | pilocytic astrocytoma                                 | + | low grade glioma, subclass midline pilocytic astrocytoma         | + |
| DX-BLN-073 | M | Craniopharyngioma                   | craniopharyngioma, adamantinomatous                              | 0,555 | craniopharyngioma, adamantinomatous                   | + | craniopharyngioma, adamantinomatous                              | + |
| DX-BLN-074 | M | Pilocytic astrocytoma               | low grade glioma, subclass posterior fossa pilocytic astrocytoma | 0,691 | pilocytic astrocytoma                                 | + | low grade glioma, subclass posterior fossa pilocytic astrocytoma | + |
| DX-BLN-    | M | Pilocytic astrocytoma               | low grade glioma, subclass posterior                             | 0,405 | pilocytic astrocytoma                                 | + | low grade glioma, subclass posterior                             | + |

|     |  |  |                                |  |  |  |                                |  |
|-----|--|--|--------------------------------|--|--|--|--------------------------------|--|
| 075 |  |  | fossa pilocytic<br>astrocytoma |  |  |  | fossa pilocytic<br>astrocytoma |  |
|-----|--|--|--------------------------------|--|--|--|--------------------------------|--|
